# Phosphorylation of $\Delta$ Np63 $\alpha$ via a Novel TGF $\beta$ /ALK5 Signaling Mechanism Mediates the Anti-Clonogenic Effects of TGF $\beta$

Pratima Cherukuri<sup>1</sup>, Andrew J. DeCastro<sup>1,2</sup>, Amanda L. Balboni<sup>1,2</sup>, Sondra L. Downey<sup>1,2</sup>, Jennifer Y. Liu<sup>3</sup>, Justine A. Hutchinson<sup>1,2</sup>, James DiRenzo<sup>1,2\*</sup>

<sup>1</sup> Department of Pharmacology and Toxicology, The Audrey and Theodor Geisel School of Medicine at Dartmouth, Hanover, New Hampshire, United States of America,

<sup>2</sup> Program in Experimental Molecular Medicine, The Audrey and Theodor Geisel School of Medicine at Dartmouth, Hanover, New Hampshire, United States of America,

<sup>3</sup> Department of Biological Sciences, Dartmouth College, Hanover, New Hampshire, United States of America

## Abstract

Genetic analysis of *TP63* implicates  $\Delta$ Np63 isoforms in preservation of replicative capacity and cellular lifespan within adult stem cells.  $\Delta$ Np63 $\alpha$  is also an oncogene and survival factor that mediates therapeutic resistance in squamous carcinomas. These diverse activities are the result of genetic and functional interactions between TP63 and an array of morphogenic and morphostatic signals that govern tissue and tumor stasis, mitotic polarity, and cell fate; however the cellular signals that account for specific functions of *TP63* are incompletely understood. To address this we sought to identify signaling pathways that regulate expression, stability or activity of  $\Delta$ Np63 $\alpha$ . An siRNA-based screen of the human kinome identified the Type 1 TGF $\beta$  receptor, ALK5, as the kinase required for phosphorylation of  $\Delta$ Np63 $\alpha$  at Serine 66/68 (S66/68). This activity is TGF $\beta$ -dependent and sensitive to either ALK5-directed siRNA or the ALK5 kinase inhibitor A83-01. Mechanistic studies support a model in which ALK5 is proteolytically cleaved at the internal juxtamembrane region resulting in the translocation of the C-terminal ALK5-intracellular kinase domain (ALK5<sup>IKD</sup>). In this study, we demonstrate that ALK5-mediated phosphorylation of  $\Delta$ Np63 $\alpha$  is required for the anti-clonogenic effects of TGF $\beta$  and ectopic expression of ALK5<sup>IKD</sup> mimics these effects. Finally, we present evidence that ultraviolet irradiation-mediated phosphorylation of  $\Delta$ Np63 $\alpha$  is sensitive to ALK5 inhibitors. These findings identify a non-canonical TGF $\beta$ -signaling pathway that mediates the anti-clonogenic effects of TGF $\beta$  and the effects of cellular stress via  $\Delta$ Np63 $\alpha$  phosphorylation.

**Citation:** Cherukuri P, DeCastro AJ, Balboni AL, Downey SL, Liu JY, et al. (2012) Phosphorylation of  $\Delta$ Np63 $\alpha$  via a Novel TGF $\beta$ /ALK5 Signaling Mechanism Mediates the Anti-Clonogenic Effects of TGF $\beta$ . PLoS ONE 7(11): e50066. doi:10.1371/journal.pone.0050066

**Editor:** Carol Feghali-Bostwick, University of Pittsburgh, United States of America

**Received:** July 12, 2012; **Accepted:** October 19, 2012; **Published:** November 16, 2012

**Copyright:** © 2012 Cherukuri et al. This is an open-access article distributed under the terms of the Creative Commons Attribution License, which permits unrestricted use, distribution, and reproduction in any medium, provided the original author and source are credited.

**Funding:** This work was supported in part grants to J.D.R. from the National Cancer Institute (5R01CA108539-05), the United States Department of Defense Breast Cancer Research Program (BC095560) and a Prouty Pilot Award from the Friends of the Norris Cotton Cancer Center. The funders had no role in study design, data collection and analysis, decision to publish, or preparation of the manuscript.

**Competing Interests:** The authors have declared that no competing interests exist.

\* E-mail: james.direnzo@dartmouth.edu

## Introduction

TP63 is a member of the p53 family of transcriptional regulators [1] that preserves long-term regenerative stasis in diverse epithelial structures by maintaining the replicative capacity of adult stem cells [2,3]. Several lines of evidence also implicate TP63 in multiple aspects of cancer initiation and progression. The mechanisms by which TP63 carries out these critical functions in development and disease are not fully understood, and progress toward this end is complicated by the fact that TP63 encodes as many as eight p63 isoforms. Differential usage of distal and proximal promoters results in isoforms with (TAp63) or without ( $\Delta$ Np63) an amino-terminal trans-activation domain homologous to that of p53. Additionally alternative mRNA splicing results in C-terminal diversity.  $\Delta$ Np63 $\alpha$  is the predominant TP63 isoform in regenerative compartments of diverse epithelial structures and tumors of squamous epithelial origin. Isoform specific knockouts unambiguously indicate that the  $\Delta$ Np63 isoforms account for the maintenance of replicative capacity [4,5]. A second layer of complexity arises from studies indicating that  $\Delta$ Np63 $\alpha$  occupies greater than 5000 sites across the human genome and that these

sites correlate with activation and repression of transcriptional targets [6]. Finally, the stability, transcriptional activity and cellular localization of TP63 gene products are regulated post-translationally by multiple phosphorylation events as well as by ubiquitination [7], SUMOylation [8] and ISGylation [9]. This combination of isoform diversity, widespread genomic occupancy, and post-translational regulation underscores the challenges of identifying the regulatory mechanisms and transcriptional targets of TP63 that account for its complex role in tissue and tumor stasis.

$\Delta$ Np63 $\alpha$  has been shown to play important roles in cancer initiation and progression suggesting that pharmacologic strategies that disrupt the activity of  $\Delta$ Np63 $\alpha$  have the potential for therapeutic benefit.  $\Delta$ Np63 $\alpha$  is an oncogene that suppresses the activity of the Ink4A/ARF locus [10] and opposes the tumor suppressive effects of cellular senescence [11,12] suggesting a role in oncogenic initiation [13]. TP63 is amplified at the genomic level in 9.7% of head and neck squamous cell carcinomas, 12.9% of serous ovarian carcinomas, 23% of squamous cervical carcinomas and 28.5% of lung squamous cell carcinomas (<http://cbiportal>).



well at a concentration of 0.5 pmoles using siPORT NeoFX Transfection Agent (Cat#AM4511). Forty-eight hours post siRNA transfection; cells were infected with  $\Delta$ Np63 $\alpha$ -WT adenovirus resulting in 90% infection efficiency. Quantitative immunofluorescence assays were then performed using the anti-phospho-p63 (Ser160/162) antibody. Immunofluorescence assays were performed as described below. Fluorescent values were obtained using the Molecular Devices Gemini XS Fluorescent Microplate Reader (EX: 540, EM: 570 and Cutoff: 570). Raw fluorescence values were normalized against total cell count, three different negative controls and a positive control. To obtain total cell count, cells after IF readings were stained with crystal violet. After a rigorous wash with distilled water, stain from the cells were eluted in a 20% methanol and 10% acetic acid solution, values were read at 595 nm using the Molecular Devices Thermo Max Microplate reader at 595 nm.

### Small-interfering RNA (siRNA) Transfection

Silencer select pre validated small-interfering RNA against TGF $\beta$ RI and TGF $\beta$ RII (Catalog #: 4390824) were purchased from Ambion. Ambion's siPORT NeoFX Transfection Agent was used in all siRNA transfections according to the manufacturer's protocol. Ambion Silencer<sup>®</sup>Negative Control #2 siRNA (Cat#AM4613) was used as control for all siRNA transfections. Forty eight hours post siRNA transfection, cells were transfected with GFP,  $\Delta$ Np63 $\alpha$ -WT or  $\Delta$ Np63 $\alpha$ -AA mutant plasmids, and harvested 24 hrs after plasmid addition in 1XSDS lysis buffer for further analysis by immunoblotting.

### Western Analysis and Immunofluorescence

Cells were lysed in 1XSDS lysis buffer with  $\beta$ -mercaptoethanol and were resolved by 10% SDS- PAGE. Antibodies used for western and Immunofluorescence were anti-p63 Clone 4A4 (Sigma, Cat#P3737) for total P63, anti-phospho-p63 (Ser160/162) (Cell signaling, Cat#4981), anti-phospho-Smad2 (Ser465/467) (Cell signaling, Cat#3108), anti-Smad2 (Cell signaling, Cat#3122), anti-TGF $\beta$  RII (L-21) (Santa Cruz, Cat#sc-400), anti-TGF $\beta$  RI (V-22) antibody from (Santa Cruz, Cat#sc-398) and anti- $\beta$ -Actin antibody from (Cell signaling, Cat#3700). All primary antibodies were detected with their respective secondary HRP- conjugated antibodies using Millipore chemiluminescence. Primary antibodies for Immunofluorescence assays were detected with either anti-mouse-Alexa Fluor 488 (Invitrogen#A11029) or anti-rabbit-Alexa Fluor 555 (Invitrogen#A21429).

### Colony Formation Assay

IMEC cells were plated at 1000 cells per well in a 6-well dish. Cells were fed every other day with TGF $\beta$ 1  $\pm$  A83-01 for 10–14 days. Cells transfected with p63 constructs were selected for in the presence of G418. Colonies were fixed in ice-cold 80% methanol and stained with 0.5% crystal violet.

### In vitro Kinase Assay

Recombinant ALK5 kinase was produced by transfecting H1299 cells with an expression vector programmed to produce C-terminally flag-tagged ALK5 Receptor. Immunoprecipitation of the Flag-tagged ALK5 kinase was performed using Pierce Classic IP kit and monoclonal ANTI-FLAG M2 antibody (Sigma Cat # F1804). Recombinant ALK5 was eluted from beads by incubation with 100  $\mu$ g/ml of soluble flag peptide (Sigma Cat # F3290) in 10 mM Tris, 150 mM NaCl, pH7.4 buffer. GST- $\Delta$ Np63 $\alpha$  was produced via IPTG induced expression in Y1090 cells. Bacteria were collected by centrifugation and lysed by sonication in the

presence of a cocktail of protease inhibitors. Lysates were cleared by centrifugation and GST- $\Delta$ Np63 $\alpha$  was enriched on glutathione-sepharose beads. For the kinase reaction either 1 or 5  $\mu$ L of soluble ALK5 was added to fixed amounts of GST- $\Delta$ Np63 $\alpha$  bound to beads in 1X kinase buffer (50 mM HEPES, 5 mM MgCl<sub>2</sub>, 1 mM CaCl<sub>2</sub>) with 10  $\mu$ M ATP. Reactions were incubated at 30°C for 30 min. Reactions were stopped by the addition of 2  $\times$  SDS Sample Buffer and western blots were done as described previously.

### Aldefluor Assay

ALDH<sup>high</sup> and ALDH<sup>low</sup> populations in IMEC cells were identified using the Aldefluor assay kit (Stem Cell Technologies). IMEC cells were plated at 25% confluence and treated with Vehicle, TGF $\beta$ 1 or A83-01 for 24 and 48 hours. Cells were then harvested and stained with ALDEFLOUR reagent as per the manufacturers protocol.

### Cell Cycle Analysis and Subcellular Fractionation

Cells were collected by trypsinization and gentle centrifugation before being re-suspended in ice cold PBS. An equal volume of ice cold 80% methanol was added with gentle vortexing and cells were fixed on ice for 30 minutes. Fixed cells were collected by centrifugation and re-suspended in PBS supplemented with 0.5  $\mu$ g/ml of RNase A. After 45 minutes at 37°C, cells were stained with propidium iodide and samples were analyzed on a BD FACScan instrument. Nuclear and cytoplasmic extracts were prepared using the EpiQuik<sup>™</sup> Nuclear Extraction Kit I according to the manufacturer's protocol.

## Results

### A Small Interfering RNA Screen of the Human Kinome Identifies ALK5 as a Putative $\Delta$ Np63 $\alpha$ Kinase

To identify the signaling pathways governing the diverse activities of  $\Delta$ Np63 $\alpha$  a siRNA-based screen of the human kinome was carried out in H1299 lung adenocarcinoma cells (Figure S1). H1299 cells do not express  $\Delta$ Np63 $\alpha$  but rapidly phosphorylate ectopic wild-type  $\Delta$ Np63 $\alpha$  ( $\Delta$ Np63 $\alpha$ -WT) but not a mutant allele in which serines at positions 66 and 68 were changed to alanine ( $\Delta$ Np63 $\alpha$ -AA) (Figure 1A). Pools of three kinase-specific siRNAs were transfected into H1299 cells. At 48 hours post transfection cells were infected with an adenovirus programmed to express  $\Delta$ Np63 $\alpha$ . Twenty four hours post infection, phospho-p63 levels were measured by immunofluorescence and quantitated using a fluorescent plate reader. Following this analysis, cells were stained with crystal violet to record cell density. Analysis of phospho- $\Delta$ Np63 $\alpha$  immunofluorescence intensity normalized to cellular density (Figure 1B) resulted in the identification of several kinases (Table in Figure S1) with normalized phospho- $\Delta$ Np63 $\alpha$  scores lower than the negative control (red dashed line). Among these was the Type 1 TGF $\beta$  Receptor (ALK5) and transfection of each of the three individual ALK5-directed siRNAs was sufficient to suppress  $\Delta$ Np63 $\alpha$  phosphorylation at S66/68, indicating that ALK5 was necessary for  $\Delta$ Np63 $\alpha$  phosphorylation (Figure 1C). To determine if ALK5 was sufficient to phosphorylate  $\Delta$ Np63 $\alpha$  H1299 cells were transfected flag-tagged ALK5 and recombinant ALK5 was isolated by anti-flag affinity chromatography and eluted with soluble flag-peptide. One and five  $\mu$ L of the eluted fraction was incubated with increasing amounts of bacterially expressed glutathione-S-transferase- $\Delta$ Np63 $\alpha$  fusion protein. Western analysis revealed that recombinant ALK5 was able to phosphorylate  $\Delta$ Np63 $\alpha$  in vitro (Figure 1D). Given that both ALK5 and GST- $\Delta$ Np63 $\alpha$  were affinity purified, these data support the assertion

that ALK5 directly phosphorylates  $\Delta$ Np63 $\alpha$ . This in turn raises questions regarding the mechanisms by which a membrane-bound kinase can phosphorylate a nuclear protein. Finally, H1299 cells were co-transfected with  $\Delta$ Np63 $\alpha$  and a series of ALK5 expression plasmids that express wild type or mutant ALK5. Phospho-p63 western analysis indicated that ectopic ALK5 resulted in phosphorylation of  $\Delta$ Np63 $\alpha$ . Remarkably, a threonine to aspartate mutation T202D (T198D in rat ALK5 NP\_036907.2) that constitutively activates TGF $\beta$  signaling [34] caused an increase in SMAD2 phosphorylation but was unable to phosphorylate  $\Delta$ Np63 $\alpha$ . Additionally a lysine to arginine mutation K232R (K226R in rat ALK5 NP\_036907.2) in rat ALK5 that fails to mediate canonical TGF $\beta$  signaling [35] and fails to phosphorylate SMAD2 but is able to efficiently phosphorylate  $\Delta$ Np63 $\alpha$  (Figure S2). These observations suggest that the intramolecular determinants of SMAD2 phosphorylation, and by extension canonical TGF $\beta$ -signaling, are distinct from those required for  $\Delta$ Np63 $\alpha$  phosphorylation. Together these studies demonstrate that ALK5 is necessary and sufficient to phosphorylate  $\Delta$ Np63 $\alpha$  and suggest that the molecular mechanisms by which ALK5 phosphorylates  $\Delta$ Np63 $\alpha$  may be distinct from those governing phosphorylation of SMAD2.

### TGF $\beta$ Stimulates ALK5-mediated Phosphorylation of $\Delta$ Np63 $\alpha$ via TGF $\beta$ R2

The finding that ALK5 is necessary and sufficient for  $\Delta$ Np63 $\alpha$  phosphorylation suggested that TGF $\beta$ -signaling governs  $\Delta$ Np63 $\alpha$  phosphorylation. We therefore sought to determine if TGF $\beta$  stimulation was sufficient to enhance  $\Delta$ Np63 $\alpha$  phosphorylation. For these studies, an hTERT-immortalized mammary epithelial cell (IMEC) line was used due to its robust expression of  $\Delta$ Np63 $\alpha$  [32] and the fact that it is cultured in a chemically-defined media, which enables experimentation under TGF $\beta$ -depleted conditions. Results indicate that TGF $\beta$  stimulation increases phospho- $\Delta$ Np63 $\alpha$  levels within one hour, indicating signaling kinetics similar to SMAD2 phosphorylation. This phosphorylation was inhibited by A83-01, a selective ALK5 kinase inhibitor [36] (Figure 2B), which supports the assertion that TGF $\beta$  mediated  $\Delta$ Np63 $\alpha$  phosphorylation requires ALK5 activity. This observation coupled to the fact that ALK5 possesses no inherent TGF $\beta$ -binding capacity suggested the involvement of TGF $\beta$ R2. siRNAs that produce a substantial reduction in TGF $\beta$ R2 expression (Figure S3) directed against TGF $\beta$  R2 were co-transfected into IMECs  $\pm$  pcDNA- $\Delta$ Np63 $\alpha$ . Phospho-p63 western analysis indicated that TGF $\beta$ R2 is necessary for TGF $\beta$ -mediated phosphorylation of  $\Delta$ Np63 $\alpha$  and SMAD2 (Figure 2C). Under TGF $\beta$ -

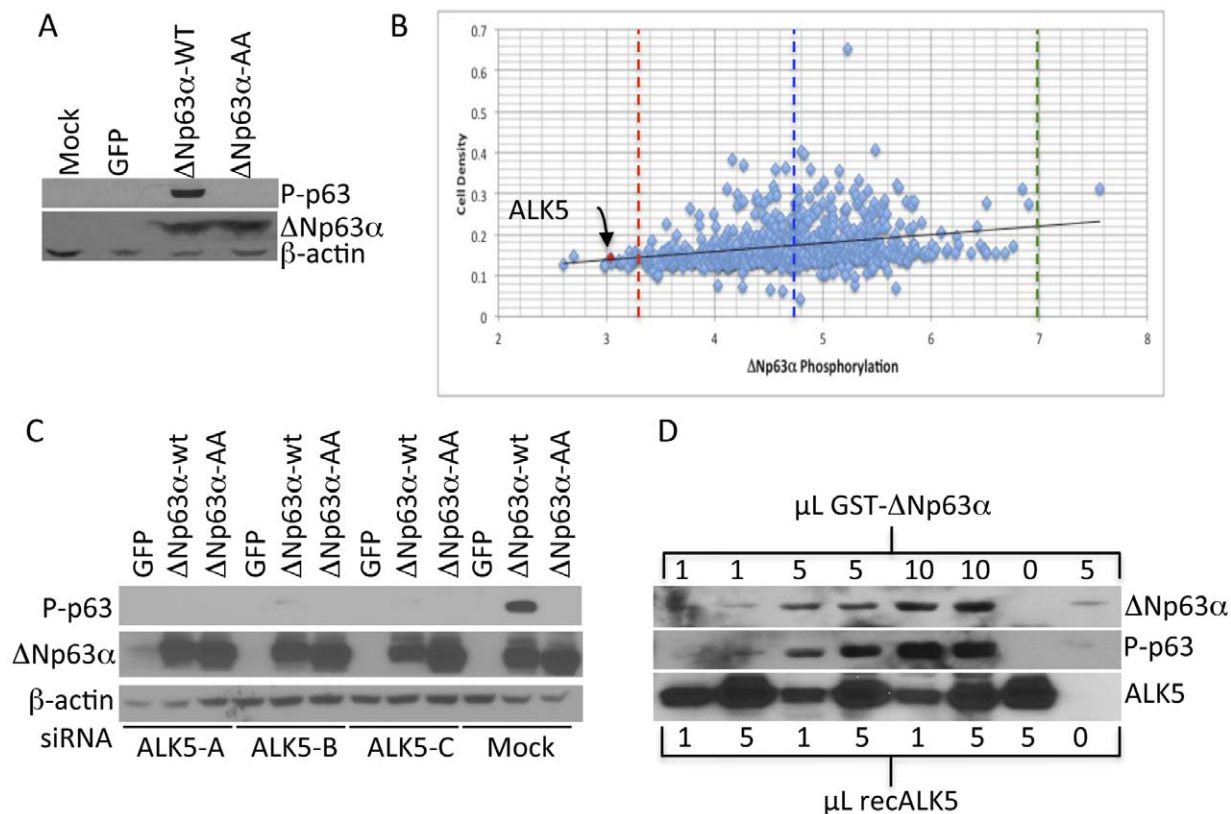

**Figure 1. An siRNA-based screen of the human kinome identifies ALK5 as a putative  $\Delta$ Np63 $\alpha$  kinase.** **A.**  $\Delta$ Np63 $\alpha$ -WT and phospho-ablative p63 mutant ( $\Delta$ Np63 $\alpha$ -AA) were transiently transfected into H1299 cells. Cell lysates were harvested after 24 hrs and the levels of phospho-P63, total p63 and  $\beta$ -actin were analyzed. **B.** Graphical representation of results of the phospho-P63 expression as indicated by normalized fluorescent values from the kinome screen. Each dot represents relative p-p63 abundance following treatment with siRNA ( $n = 3$ ) directed against a single kinase. The green dashed line represents mean positive control value and the red dashed line represents the mean negative control. The blue dashed line represents the mean phospho-p63 score in the screen. All the hits below the red dotted line were considered as possible kinases responsible for phosphorylating  $\Delta$ Np63 $\alpha$ . **C.** Three different siRNAs targeted against ALK5 were transfected into H1299 cells, 48 hrs later cells were transfected with either GFP,  $\Delta$ Np63 $\alpha$ -WT or  $\Delta$ Np63 $\alpha$ -AA expression vectors, whole cell lysates harvested after 24 hrs were analyzed for phospho-P63, total p63, and  $\beta$ -actin. **D.** Recombinant ALK5 phosphorylates  $\Delta$ Np63 $\alpha$  in vitro. Purified GST tagged  $\Delta$ Np63 $\alpha$  protein was incubated with purified Flag-ALK5 kinase for 30 min at 30°C and reactions were analyzed for phospho-P63, totalP63, and Flag-ALK5. doi:10.1371/journal.pone.0050066.g001

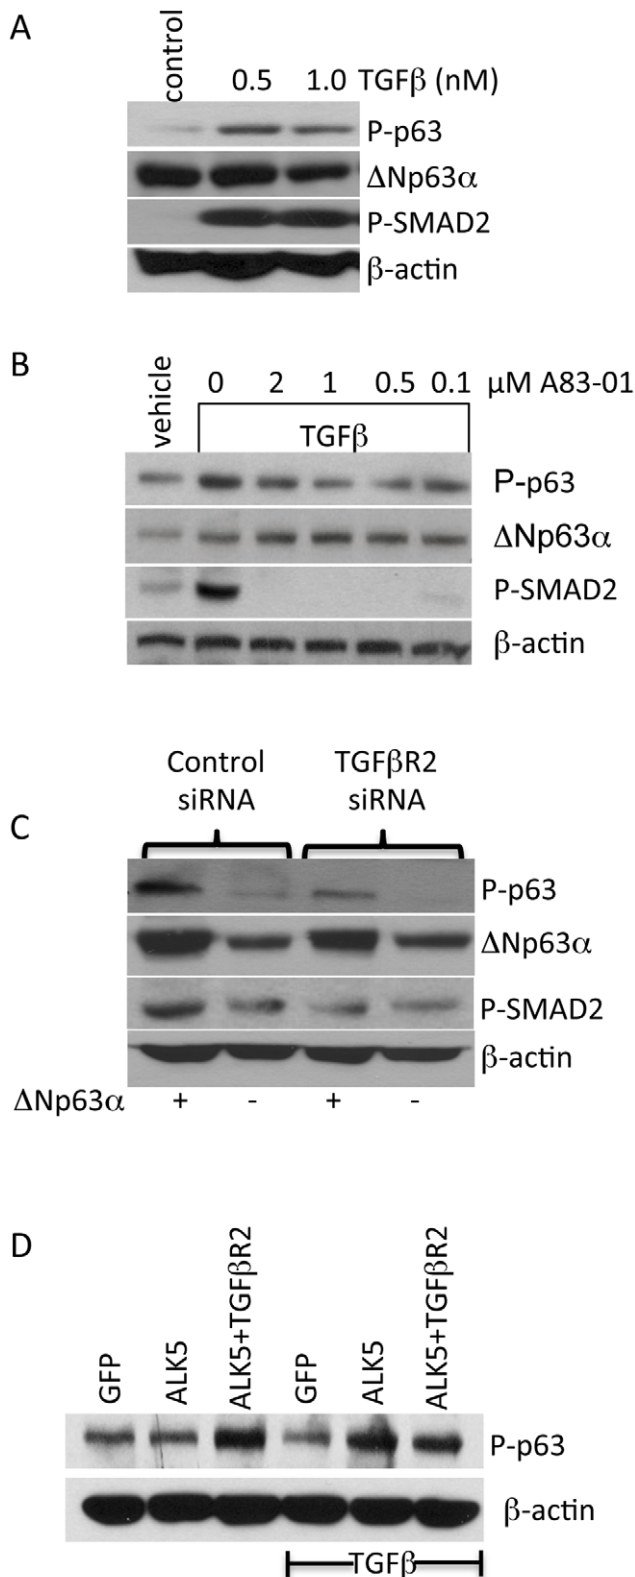

**Figure 2. TGFβ stimulates of ALK5-mediated phosphorylation of  $\Delta$ Np63 $\alpha$  via TGFβR2.** **A.** IMEC cells were treated with the indicated concentrations of TGFβ1 ligand for 1 hr. Whole cell lysates were harvested and analyzed by immunoblotting for levels of phospho-p63, total p63, phospho-SMAD2 and β-actin. **B.** ALK5-mediated phosphorylation of  $\Delta$ Np63 $\alpha$  is inhibited by A83-01. IMEC cells were treated with A83-01 at the indicated concentrations 1 hr prior to TGFβ1 treatment.

Whole cell extracts were analyzed after 1 hr for phospho-p63, total-p63, phospho-SMAD2 and β-actin via immunoblotting. **C.** siRNA targeted against TGFβR2 was transfected into IMEC cells, 48 hrs later cells were transfected with  $\Delta$ Np63 $\alpha$  expression vector or GPP control vector. Whole cell lysates were harvested 24 hrs later and analyzed for phospho-p63, total-p63, phospho-SMAD2 and β-actin. **D.** Ectopic expression of ALK5 and TGFβR2 is sufficient to phosphorylate  $\Delta$ Np63 $\alpha$  in a manner that is independent of TGFβ. doi:10.1371/journal.pone.0050066.g002

depleted culture conditions ectopic TGFβR2 promoted ALK5-mediated phosphorylation of  $\Delta$ Np63 $\alpha$  in a manner that was independent of TGFβ (Figure 2D, compare lanes 2 and 3). This result is consistent with studies indicating that TGFβ stimulates the physical association of TGFβR2 and ALK5 [37]. Together, these results indicate that TGFβ initiates ALK5-mediated  $\Delta$ Np63 $\alpha$  phosphorylation via the canonical TGFβR2/ALK5 receptor complex.

### ALK5 Mediates Phosphorylation of $\Delta$ Np63 $\alpha$ in Response to Ultraviolet Irradiation

Previous studies have shown that  $\Delta$ Np63 $\alpha$  is phosphorylated at S66/68 in response to ultraviolet (UV) irradiation [29]. Other studies have demonstrated increased TGFβ signaling in response to UV irradiation [38–40]. Additionally, recent studies have implicated TGFβ signaling in increased metastasis following ionizing radiation [41] and others have shown that ionizing radiation results in enhanced TGFβ signaling from the tumor microenvironment that results in pro-carcinogenic effects [42]. Together these studies indicate that ALK5 signaling mediates  $\Delta$ Np63 $\alpha$  phosphorylation in response to UV irradiation. To determine if ALK5 mediates UV-induced phosphorylation of endogenous  $\Delta$ Np63 $\alpha$ , IMECs were incubated in the presence or absence of A83-01 for 12 hrs and then subjected to UV irradiation. Western analysis indicated that UV irradiation stimulated phosphorylation of  $\Delta$ Np63 $\alpha$  was sensitive to A83-01, indicating that ALK5 was able to phosphorylate  $\Delta$ Np63 $\alpha$  in response to UV irradiation (Figure 3A). Interestingly, UV irradiation also increased phosphorylation of SMAD2 in a manner that was sensitive to A83-01 suggesting that the mechanism(s) by which UV irradiation induces TGFβ-signaling most likely act upstream of ALK5. Similarly H1299 cells were transfected with GFP,  $\Delta$ Np63 $\alpha$  -WT or the phospho-ablative mutant,  $\Delta$ Np63 $\alpha$ -AA, and cells were either mock exposed or exposed to UV irradiation followed by treatment with A83-01 or vehicle. Western blot analysis indicated that phosphorylation of  $\Delta$ Np63 $\alpha$  at S66/68 increased in response to UV irradiation and that inhibition of ALK5 with A83-01 was sufficient to ablate  $\Delta$ Np63 $\alpha$  phosphorylation (Figure 3B). Together these studies indicate that ALK5 mediates UV-induced activation of TGFβ-signaling which leads to increased phosphorylation of SMAD2 and  $\Delta$ Np63 $\alpha$ . These studies implicate ALK5 in a previously unknown role in the cellular stress response and suggest that disruption of  $\Delta$ Np63 $\alpha$  phosphorylation may sensitize cells to diverse types of cellular stress. Coupled to studies indicating that  $\Delta$ Np63 $\alpha$  is a potent blockade to apoptosis in experimental models of HNSCC [16] and triple negative breast cancer [15] these studies identify a potential strategy to subvert  $\Delta$ Np63 $\alpha$  mediated drug resistance by inhibiting TGFβ signaling.

### Nuclear Accumulation of the Intracellular Kinase Domain of ALK5 (ALK5<sup>IKD</sup>) in Response to TGFβ

The identification of ALK5 as a  $\Delta$ Np63 $\alpha$  kinase and the demonstration that this event is initiated by TGFβ raised significant questions regarding the mechanisms by which a

membrane bound kinase phosphorylates  $\Delta$ Np63 $\alpha$ , which is located in the nucleus. ALK5 activation is propagated through multiple transduction pathways, several of which rely upon diverse kinase activities [43–45]. To determine if any of these known pathways mediate  $\Delta$ Np63 $\alpha$  phosphorylation, phospho- $\Delta$ Np63 $\alpha$  immunofluorescence data from the kinome-wide siRNA screen was re-evaluated. Results of this evaluation indicated that no other kinase known to be downstream of ALK5 was implicated in  $\Delta$ Np63 $\alpha$  phosphorylation (Figure S4). Additionally, western analysis of IMECs transfected with ALK5 siRNA identified a 34-kDa fragment that was sensitive to ALK5-directed siRNA and detectable with an antisera directed against the C-terminus of ALK5 (Figure 4A). The 34-kDa size coupled to selective detection with a C-terminally directed antibody suggested that this band is the product of proteolytic cleavage of ALK5 at or near the intracellular juxtamembrane region. To test this hypothesis, a plasmid encoding C-terminally-flag-tagged versions of wild-type ALK5 was transfected into H1299 cells and flag-tagged proteins were detected by western blot. Results indicated that ectopic expression of ALK5 results in a 56 kDa full-length receptor and a 34 kDa C-terminal fragment (Figure 4B) suggesting that exogenous ALK5 was processed in a manner that is similar or identical to endogenous ALK5. Since these experiments were done by transfecting cDNAs of wild-type and mutant ALK5, these results also demonstrate that the 34-kDa fragment is unlikely to be the result of alternative mRNA splicing. These observations support a model in which TGF $\beta$  stimulates proteolytic cleavage of ALK5 and that the 34 kDa ALK5 intracellular kinase domain (ALK5<sup>IKD</sup>) would preferentially localize in the nucleus. Western analysis of nuclear and cytoplasmic extracts from IMECs indicated that the 34-kDa ALK5 C-terminal fragment was selectively localized to the nucleus (Figure 4C). To determine if ALK5 is able to translocate to the nucleus, an ALK5-GFP fusion expression vector [46] was transfected into IMECs under TGF $\beta$ -depleted conditions and cells were then stimulated with vehicle or TGF $\beta$ . Fluorescence microscopy indicated that TGF $\beta$  stimulated the redistribution of ALK5-GFP the nucleus, consistent with the nuclear localization of the ALK5<sup>IKD</sup> (Figure 4D). Similarly, stimulation of H1299 cells with TGF $\beta$  resulted in redistribution of ALK5 from the cytoplasm to the nucleus (Figure 4E). Transfection of ALK5-directed siRNA confirms the specificity of the immuno-

fluorescent analysis (Figure S5). Together these observations support a mechanistic model in which TGF $\beta$  stimulation initiates the nuclear translocation of ALK5, thereby enabling phosphorylation of  $\Delta$ Np63 $\alpha$ .

### TGF $\beta$ is Anti-proliferative and Suppresses ALDH1 Activity and $\Delta$ Np63 $\alpha$ Protein Levels in a Mammary Stem Cell Model

The hTERT immortalized mammary epithelial cells (IMECs) were derived via retroviral transduction of the catalytic subunit of human telomerase (hTERT) into primary human mammary epithelia and clones were selected for their ability to bypass replicative senescence [32]. Subsequent analysis of multiple clonal IMEC lines indicated a basal/myoepithelial cytokeratin profile and robust expression of  $\Delta$ Np63 $\alpha$ . Other studies indicated that IMECs possess developmental potency based upon their ability to produce acinar structures with biochemically distinct basal and luminal layers [47]. Based upon these similarities to mammary stem cells, we sought to understand the biological effects of TGF $\beta$  on IMECs and to determine the degree to which phosphorylation of  $\Delta$ Np63 $\alpha$  contributes to these effects. TGF $\beta$  caused a significant decrease in cell number over 72 hours, and this effect was reversed by co-treatment with A83-01 (Figure 5A). Cell cycle distribution analysis indicated a decrease in the population of cells in S-phase in response to TGF $\beta$  and a corresponding increase of cells in S-phase in response to A8301 (Figure 5B). To address the effects of TGF $\beta$  on stem cell activity, IMEC sub-populations with features of stem cells were enriched on the basis of high aldehyde dehydrogenase 1 (ALDH1) activity [48]. Analysis of  $\Delta$ Np63 $\alpha$  mRNA levels in ALDH1<sup>high</sup> and ALDH1<sup>low</sup> fractions indicated that  $\Delta$ Np63 $\alpha$  mRNA levels were significantly enriched in the ALDH1<sup>high</sup> self-renewing population (Figure 5C). This enrichment for  $\Delta$ Np63 $\alpha$  expression is consistent with the assertion that ALDH1<sup>high</sup> fractions of IMECs are enriched for self-renewing capacity and also indicates that TGF $\beta$  may influence this fraction via  $\Delta$ Np63 $\alpha$  phosphorylation. To test this, IMECs were treated with vehicle, TGF $\beta$  or A83-01 for 24 and 48 hours, and the ALDH1<sup>high</sup> fraction was measured. Results indicated that TGF $\beta$  treatment significantly reduced ALDH1 activity in IMECs resulting in a smaller ALDH1<sup>high</sup> cellular fraction (Figure 5D and Figure S6) The reduction in ALDH1<sup>high</sup> cells in response to

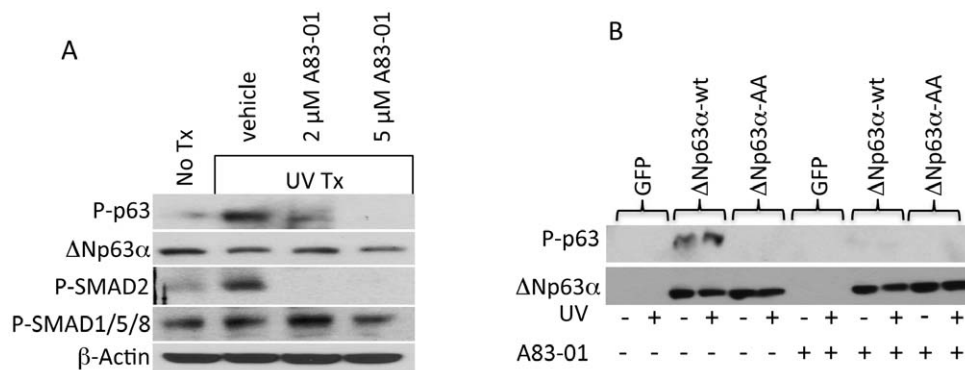

**Figure 3. ALK5 mediates phosphorylation of  $\Delta$ Np63 $\alpha$  in response to ultraviolet irradiation.** **A.** IMEC cells were plated and treated with the indicated amounts of A83-01 or vehicle for 12 hrs after which cells were exposed to 50 J/m<sup>2</sup> UV radiation. Whole cell lysates were collected after 1 hr of UV treatment and analyzed by immunoblotting for phospho-P63, total-P63, phospho-SMAD2 and  $\beta$ -actin levels. Phospho-SMAD1/5/8 was used as a control to show that there were no off-target effects for A83-01 at the concentrations used. **B.** H1299 cells were transfected with GFP,  $\Delta$ Np63 $\alpha$ -WT or  $\Delta$ Np63 $\alpha$ -AA expression vectors and cells were treated with 2  $\mu$ M A83-01 or vehicle control. Twenty-four hours later cells were exposed to 50 J/m<sup>2</sup> UV radiation and whole cell extracts were collected after 1 hr to analyze the levels of phospho-P63, total-P63 and  $\beta$ -actin by immunoblotting.

doi:10.1371/journal.pone.0050066.g003

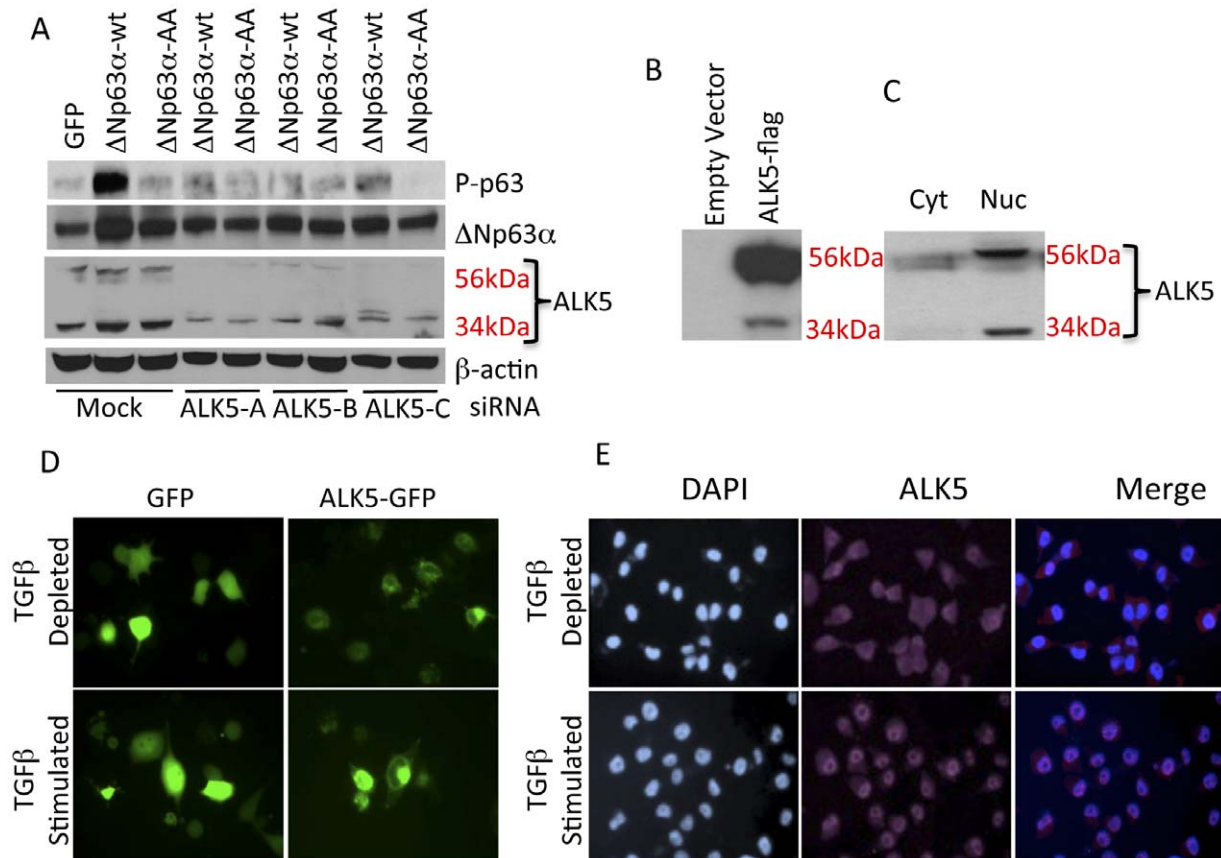

**Figure 4. Nuclear accumulation of the intracellular kinase domain of ALK5 (ALK5<sup>IKD</sup>) in response to TGF $\beta$ .** **A.** Three different siRNAs targeted against ALK5 were transfected into IMEC cells, 48 hrs later cells were transfected with GFP,  $\Delta$ Np63 $\alpha$ -WT and  $\Delta$ Np63 $\alpha$ -AA expression vectors, whole cell lysates were harvested after 24 hrs and analyzed for phospho-p63, total p63, TGF $\beta$ R1 and  $\beta$ -actin. **B.** H1299 cells were transfected with an ALK5-WT-Flag expression vector, whole cell lysates were harvested and analyzed for full length and cleaved fragments with anti-Flag antibody. **C.** Analysis of ALK5 distribution in IMECs indicates that the 34 kDa C-terminal ALK5 fragment is present only in the nucleus. **D.** H1299 cells were transfected with ALK5-GFP expression vector, 6 hrs after transfection cells were treated with vehicle control or TGF $\beta$ 1 for 8 hrs and imaged for subcellular distribution of GFP. **E.** H1299 cells were serum starved for 12 hr and then induced with vehicle control or TGF $\beta$ 1 for 1 hour. Cells were stained with anti- TGF $\beta$ R1 (V-22) antibody. Depletion of TGF $\beta$ R1 in H1299 cells by siRNA is shown as a control for the specificity of the antibody. doi:10.1371/journal.pone.0050066.g004

TGF $\beta$ , coupled to the fact that  $\Delta$ Np63 $\alpha$  expression is increased in this fraction suggested that TGF $\beta$  might be opposing the activity of  $\Delta$ Np63 $\alpha$ . Together these data indicate that TGF $\beta$  signaling in IMECs is anti-proliferative and targets self-renewing populations that are enriched for  $\Delta$ Np63 $\alpha$  expression.

The previous data suggests that TGF $\beta$  opposes the activity or expression of  $\Delta$ Np63 $\alpha$ . This coupled to previous studies indicating that phosphorylation of  $\Delta$ Np63 $\alpha$  at S66/68 leads to its destabilization suggested that TGF $\beta$  might oppose  $\Delta$ Np63 $\alpha$  by causing its degradation. To test this, IMECs were treated with TGF $\beta$  or A83-01 in the absence or presence of cycloheximide. Under these conditions treatment of IMECs with TGF $\beta$  for 4 hours in the absence of *de novo* protein synthesis selectively repressed  $\Delta$ Np63 $\alpha$  protein levels indicating that TGF $\beta$  may destabilize  $\Delta$ Np63 $\alpha$  (Figure 6A). To determine if the phosphorylated form of  $\Delta$ Np63 $\alpha$  was preferentially destabilized, cells were pre-treated with vehicle, TGF $\beta$  or A83-01 for 1 hour followed by treatment with vehicle or cycloheximide for 4 hours and phospho-p63 levels were evaluated by western blot. Consistent with data in Figure 2, TGF $\beta$  stimulation leads to increased phosphorylation of  $\Delta$ Np63 $\alpha$ , however, treatment with cycloheximide resulted in the destabilization of phospho-p63 signal in the TGF $\beta$ -treated sample, indicating that TGF $\beta$ -mediated phosphorylation of  $\Delta$ Np63 $\alpha$

destabilizes  $\Delta$ Np63 $\alpha$  (Figure 6B). To determine if TGF $\beta$ -stimulated degradation of  $\Delta$ Np63 $\alpha$  was mediated by the 26S proteasome, H1299 cells were transfected with GFP,  $\Delta$ Np63 $\alpha$ -WT and  $\Delta$ Np63 $\alpha$  AA under conditions that actively promoted TGF $\beta$  signaling. Cells were then treated for 2 hours with vehicle or 1  $\mu$ M MG-132. Western analysis showed that phosphorylated  $\Delta$ Np63 $\alpha$  was stabilized by MG132 indicating that phospho- $\Delta$ Np63 $\alpha$  is degraded by the 26S proteasome. Western analysis for total  $\Delta$ Np63 $\alpha$  indicated that MG132 caused an increase in  $\Delta$ Np63 $\alpha$ -WT but not in  $\Delta$ Np63 $\alpha$ -AA, indicating that targeting of  $\Delta$ Np63 $\alpha$  to the 26S proteasome requires phosphorylation of serines 66 and 68. These findings support a model in which TGF $\beta$ -mediated phosphorylation of  $\Delta$ Np63 $\alpha$  leads to its degradation by the 26S proteasome.

### The Anti-clonogenic Effects of TGF $\beta$ Require Phosphorylation of $\Delta$ Np63 $\alpha$

TGF $\beta$  signaling has been shown to be a tumor suppressive during early stages of breast cancer initiation and to promote breast cancer progression and metastasis at later stages [18]. The specific targets and signaling pathways governing these divergent effects are incompletely understood. The previous results indicate that TGF $\beta$  signaling is growth inhibitory and destabilizes  $\Delta$ Np63 $\alpha$

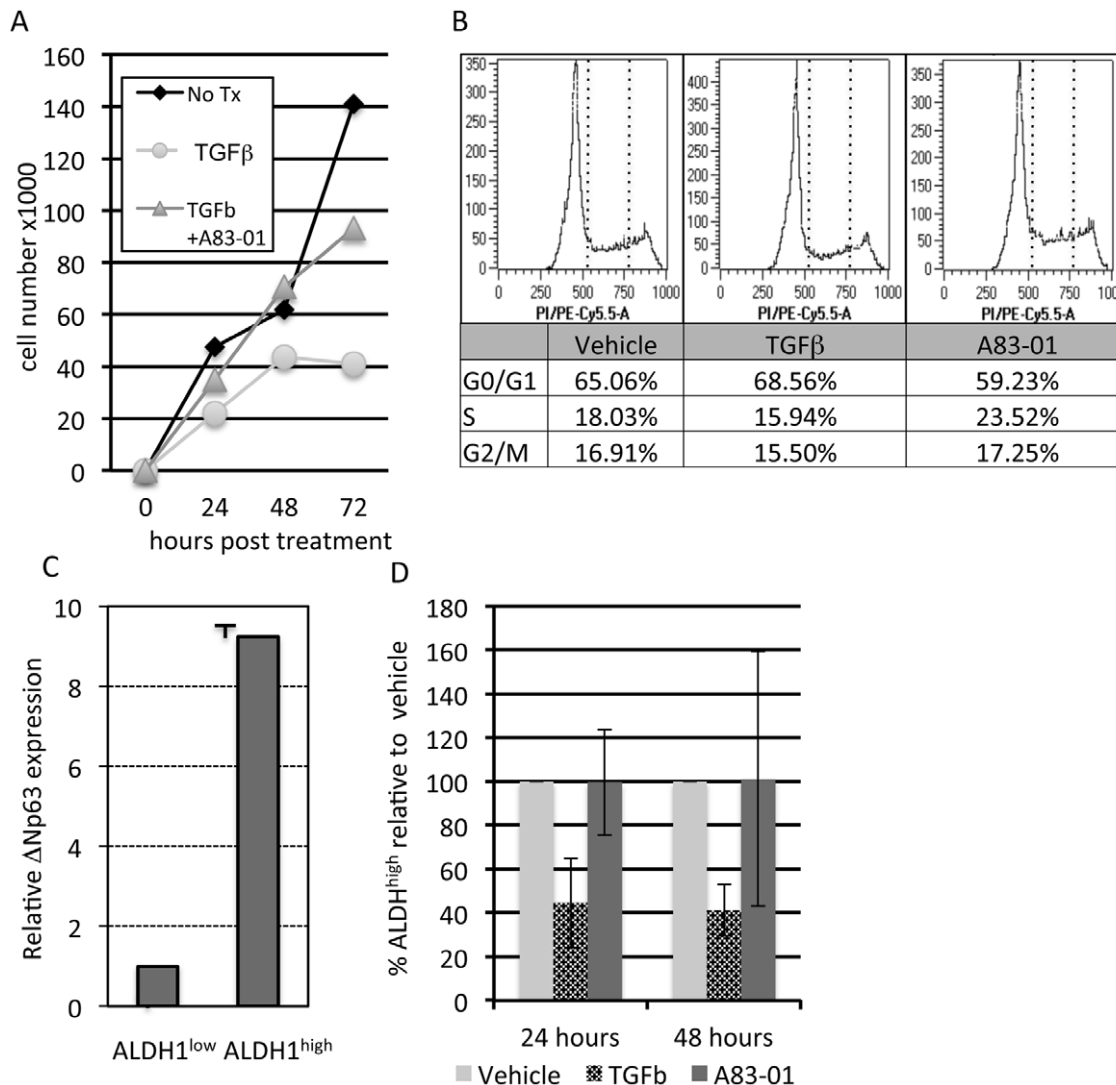

**Figure 5. TGF $\beta$  is anti-proliferative and suppresses ALDH1 and  $\Delta$ Np63 $\alpha$  protein levels activity in a mammary stem cell model. A.** Cell counts plotted for IMEC cells treated with control, TGF $\beta$ 1 and A83-01 for the indicated time points. Data are representative of multiple **B.** Cell cycle analysis was performed by PI staining on IMEC cells after treatment with control, TGF $\beta$ 1 or A83-01 for the indicated time points. Dashed lines flank the S-phase region. **C.** IMEC cells were sorted based on the ALDH staining,  $\Delta$ Np63 $\alpha$  mRNA expression levels were analyzed using quantitative PCR. **D.** IMEC cells expressing ALDH high and low were analyzed after treating IMEC cells with vehicle control, TGF $\beta$ 1 and A83-01 at the indicated time points. **E.** IMEC cells were treated with control or cycloheximide (CHX) for 2 hrs and then treated with TGF $\beta$ 1 or A83-01 for 2 hrs. Whole cell lysates were analyzed for  $\Delta$ Np63 $\alpha$  and  $\beta$ -actin. **F.** IMEC cells were treated with control, TGF $\beta$ 1 and A83-01 for 1 hr, after which cells were treated with control and CHX for 4 hrs. Whole cell lysates were analyzed for Phospho-p63 and  $\beta$ -actin.  
doi:10.1371/journal.pone.0050066.g005

via phosphorylation. To determine if phosphorylation of  $\Delta$ Np63 $\alpha$  is required for the anti-proliferative effects of TGF $\beta$ , IMECs were transfected with GFP,  $\Delta$ Np63 $\alpha$ -WT or  $\Delta$ Np63 $\alpha$ -AA and selected in G418 while simultaneously being treated with either TGF $\beta$  or A83-01. Colonies were allowed to grow for 15 days and then fixed and stained with crystal violet. Consistent with the observed effects on proliferation and ALDH1 activity, TGF $\beta$  treatment was anti-clonogenic, while A83-01 promoted colony formation (Figure 7A and Figure S7A). Additionally, the anti-clonogenic effect of TGF $\beta$  was rescued by  $\Delta$ Np63 $\alpha$ -AA but not  $\Delta$ Np63 $\alpha$ -WT (Figure 7A). To determine if these differences were statistically significant, a two-tailed T-Test of the effects of TGF $\beta$  on colony formation in each transfection group revealed that TGF $\beta$  caused a statistically significant reduction in colony formation in the GFP transfectant

( $P = 0.00167$ ) and the  $\Delta$ Np63 $\alpha$ -WT transfectant ( $P = 0.000433$ ), but not in the  $\Delta$ Np63 $\alpha$ -AA transfectant ( $P = 0.4676$ ). This statistical analysis supports the assertion that  $\Delta$ Np63 $\alpha$ -AA was able to rescue the anti-clonogenic effects of TGF $\beta$ . The coupled to the finding that  $\Delta$ Np63 $\alpha$ -WT was unable to rescue these effects supports the conclusion that the anti-clonogenic effects of TGF $\beta$  require phosphorylation of  $\Delta$ Np63 $\alpha$  at serine 66 and 68. This result indicates that the anti-clonogenic effects of TGF $\beta$  require  $\Delta$ Np63 $\alpha$  phosphorylation. This observation coupled to data indicating that TGF $\beta$  stimulates nuclear translocation of ALK5 suggests that the intracellular kinase domain of ALK5 (ALK5<sup>IKD</sup>) mediates TGF $\beta$ -stimulated phosphorylation of  $\Delta$ Np63 $\alpha$  and the anti-clonogenic effects of TGF $\beta$ . To address this, an expression vector was developed to produce ALK5<sup>IKD</sup> and transfected into

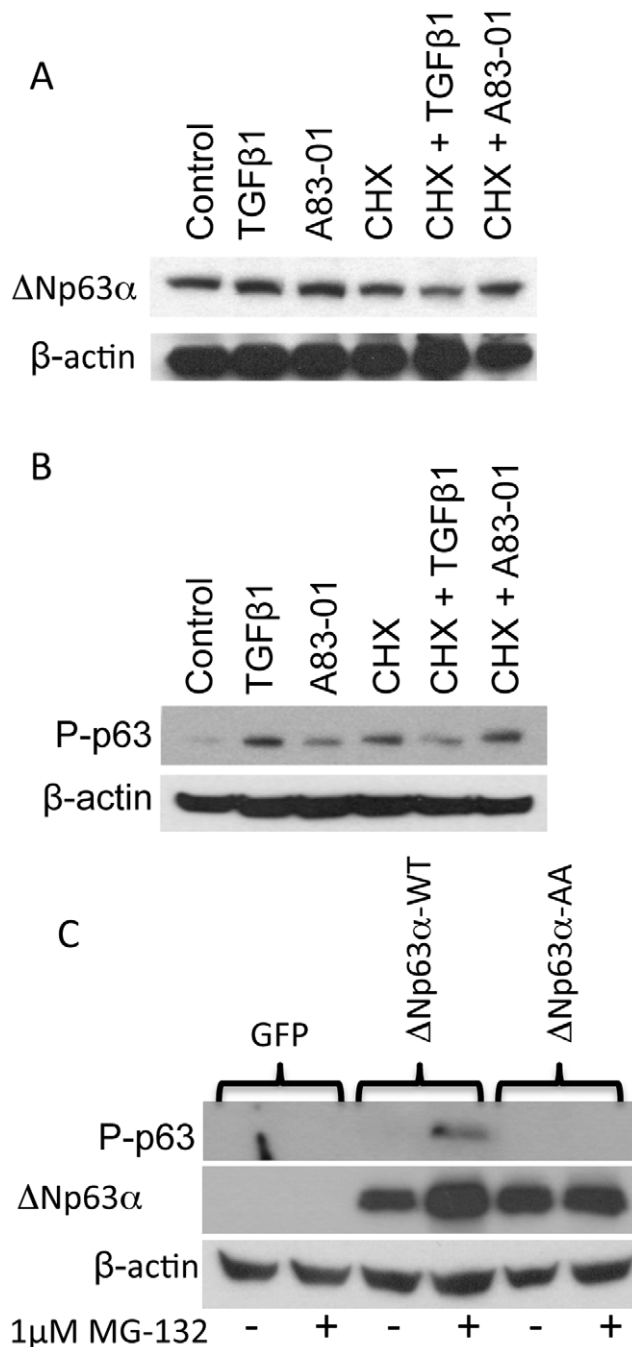

**Figure 6. TGF $\beta$  treatment destabilizes  $\Delta$ Np63 $\alpha$  in a manner that is dependent upon the kinase activity of ALK5.** A. TGF $\beta$  increases the rate of  $\Delta$ Np63 $\alpha$  turnover. IMECs were treated with vehicle or cycloheximide followed by treatment with vehicle, TGF $\beta$  or A8301. B. TGF $\beta$ -stimulation selectively increases the rate of turnover of phospho- $\Delta$ Np63 $\alpha$ . IMECs were treated with vehicle, TGF $\beta$  or A83-01 followed by vehicle or cycloheximide. C. Phospho-p63 is stabilized by the 26S proteasome inhibitor MG132. H1299 cells were transfected with GFP,  $\Delta$ Np63 $\alpha$  WT and  $\Delta$ Np63 $\alpha$  AA and treated for 2 hours with 1  $\mu$ M MG-132.

doi:10.1371/journal.pone.0050066.g006

IMECs. Consistent with the proposed model, ectopic ALK5<sup>IKD</sup> accumulates in the nucleus (Figure 6B) and phosphorylates  $\Delta$ Np63 $\alpha$  in a manner that is independent of TGF $\beta$  but sensitive

to A83-01 (Figure 6C). The observation that ectopic ALK5<sup>IKD</sup> is sufficient to phosphorylate  $\Delta$ Np63 $\alpha$  under TGF $\beta$ -depleted conditions is consistent with a model in which TGF $\beta$  signaling is bypassed by directly targeting ALK5<sup>IKD</sup> to the nucleus. This observation predicts that ALK5<sup>IKD</sup> is sufficient to recapitulate the anti-clonogenic effects of TGF $\beta$ . IMECs were transfected with expression plasmids encoding ALK5<sup>IKD</sup> and either  $\Delta$ Np63 $\alpha$ -WT or  $\Delta$ Np63 $\alpha$ -AA. G418 resistant colonies were selected and quantified. Results indicated that ALK5<sup>IKD</sup> was potentially anti-clonogenic (Figure 6D) and that this effect was partially rescued by  $\Delta$ Np63 $\alpha$ -WT and completely rescued by  $\Delta$ Np63 $\alpha$ -AA (Figure 6E). These results confirm that the anti-clonogenic effects of TGF $\beta$  in IMECs are mediated by ALK5<sup>IKD</sup> and require phosphorylation of  $\Delta$ Np63 $\alpha$ . These studies identify  $\Delta$ Np63 $\alpha$  as a novel target of TGF $\beta$  signaling and indicate that the ability of  $\Delta$ Np63 $\alpha$  to promote colony formation is potentially inhibited by TGF $\beta$ .

## Discussion

We report the identification of the Type 1 TGF $\beta$  Receptor, ALK5, as a kinase that mediates phosphorylation of  $\Delta$ Np63 $\alpha$  at S66/68. Our studies indicate that TGF $\beta$  stimulation and UV irradiation also phosphorylate  $\Delta$ Np63 $\alpha$  at S66/68 and this effect is sensitive to pharmacologic inhibition of ALK5 with A83-01. We present data indicating that TGF $\beta$  is able to stimulate the nuclear translocation of ALK5 and that a 34 kDa C-terminal truncation of ALK5 preferentially translocates to the nucleus. Our studies indicate that the anti-clonogenic effects of TGF $\beta$  are mediated by  $\Delta$ Np63 $\alpha$  phosphorylation. Coupled to the established role of  $\Delta$ Np63 $\alpha$  in the long-term preservation of proliferative capacity in adult stem cells, these studies suggest that TGF $\beta$ /ALK5/ $\Delta$ Np63 $\alpha$  signaling may contribute to the proliferative capacity of adult stem cells and tumor stem cells. Together these studies describe a previously unrecognized TGF $\beta$  signaling pathway that directly impacts the proliferative capacity and clonogenicity of  $\Delta$ Np63 $\alpha$ -positive cells. Additional studies will be necessary to determine the degree to which this pathway accounts for the effects of TGF $\beta$  on the activity of adult stem cells. Previous studies have shown that TGF $\beta$  promotes oncogene-induced senescence (OIS) in a manner that is independent of p53 [49]. Separately  $\Delta$ Np63 $\alpha$  has been shown to be a potent suppressor of OIS [13]. Here we present data indicating that TGF $\beta$  activation destabilizes  $\Delta$ Np63 $\alpha$  suggesting a potential mechanism by which TGF $\beta$  promotes OIS. This report establishes a novel signaling relationship between TGF $\beta$  and TP63 and demonstrates that this relationship underlies aspects of adult stem cell biology that are governed by  $\Delta$ Np63 $\alpha$ . Finally it will be important to elucidate the role of this signaling pathway in Epithelial to Mesenchymal Transition. Recent studies indicate that  $\Delta$ Np63 $\alpha$  opposes EMT [50–51] suggesting that TGF $\beta$ -mediated destabilization of  $\Delta$ Np63 $\alpha$  may be an important step in EMT, a process that is critical for cancer progression and metastasis. Additional studies will be necessary to systematically evaluate the cellular consequences of TGF $\beta$ -mediated phosphorylation of  $\Delta$ Np63 $\alpha$ .

Previous studies have shown that  $\Delta$ Np63 $\alpha$  is phosphorylated at S66/68 in response to UV irradiation [29]. The observation that UV-initiated phosphorylation of  $\Delta$ Np63 $\alpha$  was sensitive to A83-01 implicates ALK5 in the cellular response to stress, however, additional studies will be necessary to determine if ALK5-mediated  $\Delta$ Np63 $\alpha$  phosphorylation contributes to the role of TGF $\beta$  signaling in promoting metastasis following ionizing radiation [41]. Similarly, it will be of significant interest to determine if the potent TGF $\beta$  response of the tumor microenvironment to radiation [42] contributes to  $\Delta$ Np63 $\alpha$  phosphoryla-

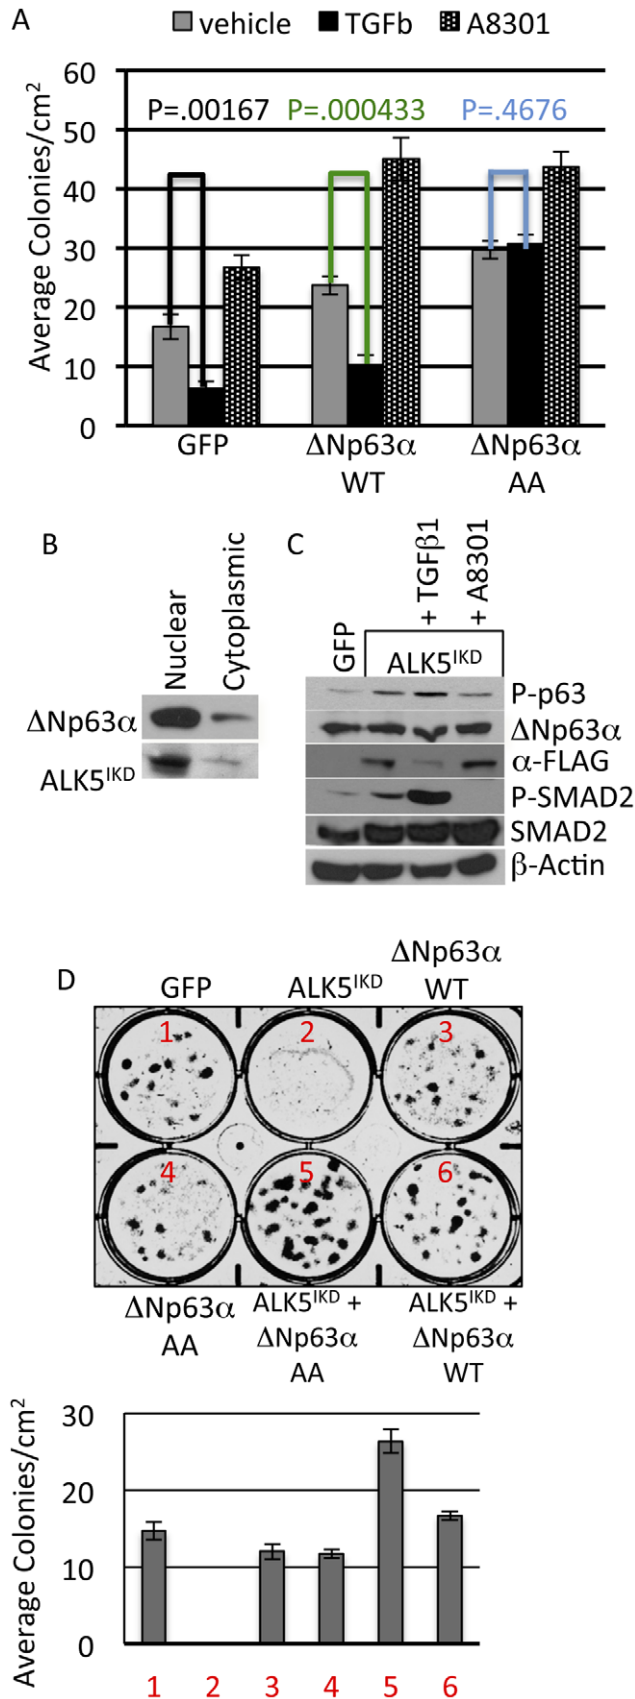

**Figure 7. The anti-clonogenic effects of TGF $\beta$  require phosphorylation of  $\Delta$ Np63 $\alpha$ .** **A.** IMEC cells were transiently transfected with GFP,  $\Delta$ Np63 $\alpha$ -WT or  $\Delta$ Np63 $\alpha$ -AA at equimolar ratios. 48 hrs after transfection cells were subjected to G418 selection with control, TGF $\beta$ 1 or A83-01. Colonies formed were then stained with crystal violet. To quantify colonies 3 randomly 1 cm<sup>2</sup> spaces per well were counted and these data were used to calculate the average number of colonies per cm<sup>2</sup>. Error bars represent the standard deviation. A two-tailed T-Test was used to determine the significance of the effects of TGF $\beta$  on colony formation in each transfection group. **B.** ALK5<sup>IKD</sup>-flag expression vector was transiently transfected into IMEC cells, 24 hrs later cells were harvested for nuclear and cytoplasmic extracts. Subcellular localization of P63 and ALK5<sup>IKD</sup> proteins were analyzed by immunoblotting with Anti-P63 and Anti-Flag antibodies. **C.** IMEC cells were transfected with GFP and ALK5<sup>IKD</sup>, 24 hrs later cells were treated with TGF $\beta$ 1 and A83-01 for 1 hr and whole cell lysates were analyzed for phospho-P63, total P63, phospho-SMAD2, total SMAD2 and  $\beta$ -actin via immunoblotting. **D.** IMEC cells were transfected with GFP or ALK5<sup>IKD</sup> at equimolar ratios. 48 hrs after transfection cells were subjected to G418 selection until visible colonies formed which were then stained with crystal violet. **E.** IMEC cells were either transfected with GFP, ALK5<sup>IKD</sup>,  $\Delta$ Np63 $\alpha$ -WT and  $\Delta$ Np63 $\alpha$ -AA or ALK5<sup>IKD</sup>+ $\Delta$ Np63 $\alpha$ -AA and ALK5<sup>IKD</sup>+ $\Delta$ Np63 $\alpha$ -WT at equimolar ratios. 48 hrs after transfection cells were subjected to G418 selection. Formed colonies were then stained with crystal violet. doi:10.1371/journal.pone.0050066.g007

tion. Coupled to the finding that TGF $\beta$ -mediated phosphorylation of  $\Delta$ Np63 $\alpha$  is anti-proliferative and anti-clonogenic, the ALK5-mediated response to cellular stress may act as a protective mechanism that limits proliferation under conditions of cellular or genotoxic stress. Additional studies will be necessary to determine if the mechanisms underlying activation of ALK5 in response to cellular stress are TGF $\beta$ -dependent or TGF $\beta$ -independent. Furthermore, it will be potentially clinically relevant to determine the biological consequences of ALK5-mediated phosphorylation of  $\Delta$ Np63 $\alpha$  in enriched tumor stem cell fractions. Finally,  $\Delta$ Np63 $\alpha$  has been shown to act as a survival factor that mediates therapeutic resistance and opposes apoptosis in breast cancers with a basal phenotype [15] and also in squamous cell carcinomas of the head and neck [16]. It will be of interest to determine if disruption of the TGF $\beta$ /ALK5/ $\Delta$ Np63 $\alpha$  signaling pathway subverts these activities thereby overcoming therapeutic resistance.

Finally, recent studies have indicated unacceptable levels of cardiac and inflammatory toxicity associated with selective ALK5 kinase inhibitors and it is likely that these adverse effects will limit their development and clinical utility [52]. Given the remarkably pleiotropic actions of TGF $\beta$ , it is not surprising that drugs that disrupt all ALK5 signaling would have a wide range of effects. This highlights the need to identify specific signaling pathways downstream of TGF $\beta$  that account for specific activities of TGF $\beta$ . Doing so will make it possible to target specific actions of TGF $\beta$  while avoiding adverse side effects. Data presented here support a model in which unknown proteolytic activity mediates the translocation of ALK5<sup>IKD</sup>. This implies that inhibition of this protease may result in disruption of  $\Delta$ Np63 $\alpha$  phosphorylation. Further studies will be necessary to identify this protease, however a recent study has shown that the TNF- $\alpha$  Converting Enzyme (TACE) is able to mediate proteolysis of ALK5 and that TACE activity is required for accumulation of ALK5 in the nucleus [53]. The specific relevance of this finding to the generation of ALK5<sup>IKD</sup> and phosphorylation of  $\Delta$ Np63 $\alpha$  is unknown because in that study TACE was shown to target the ALK5 ectodomain, which is predicted to produce a fragment greater than 34 kDa. This also raises questions regarding the mechanism(s) by which an ALK5 fragment that retains the transmembrane domain might translocate to the nucleus. Presently the protease(s) that account

for generation of ALK5<sup>IKD</sup> remain unknown and their identification represents an important step in testing our model for ALK5-mediated  $\Delta$ Np63 $\alpha$  phosphorylation and also in identifying pharmacologically accessible pathway components.

## Supporting Information

**Figure S1** Schematic representation of the siRNA-based screen of the human kinome. The table at the bottom lists the top 14 hits in the screen showing the data produced from fluorescence plate readings of the IF and subsequent Abs<sub>600</sub> readings for crystal violet staining. Primary hits progressed to the secondary screen and kinases for which all three siRNAs repressed phosphorylation of DNp63 $\alpha$  were selected. (PDF)

**Figure S2** The molecular determinants of DNp63 $\alpha$  phosphorylation by ALK5 are distinct from those necessary for SMAD2/3 phosphorylation. H1299 cells were co-transfected with wild-type ALK5, the T202D mutant which had previously been shown to constitutively activate TGF $\beta$  signaling, the K232R mutant which had been previously shown to inhibit TGF $\beta$  signaling and an ALK5-GFP fusion. At 24 hours post transfection protein was harvested and analyzed by western blot. Comparison of the P-p63 and P-SMAD2/3 signals indicated that T202D was unable to phosphorylate DNp63 $\alpha$  but was able to phosphorylate SMAD2/3 (Lane 3). Remarkably the K232R mutant was able to phosphorylate DNp63 $\alpha$  but not SMAD2/3 (Lane 4). These results suggest that the molecular mechanisms by which ALK5 phosphorylates DNp63 $\alpha$  are distinct from those that phosphorylate SMAD2/3. (PDF)

**Figure S3** Effects of three TGF $\beta$ R2-directed siRNAs on expression of TGF $\beta$ R2 and SMAD2 phosphorylation. H1299 cells were transfected with the indicated siRNAs and TGF $\beta$ R2 and phospho-SMAD2 were analyzed to confirm the efficacy of the siRNA. SiRNA-C was used in the experiment shown in Figure 2C. (PDF)

**Figure S4** Schematic representation of signal transduction pathways known to be downstream of the TGF $\beta$  receptor complex. Kinases associated with these pathways are shown in

pink and the phospho-p63 vs total p63 IF score is shown as is the relationship of that score to the mean. (PDF)

**Figure S5** Transfection of H1299 cells with ALK5-directed siRNA ablates immunofluorescent detection of ALK5. This data confirms the specificity of ALK5 detection presented in Figure 4E. This data confirms the selectivity of the ALK5 antibody. (PDF)

**Figure S6** Representative Aldefluor data from which Figure 5D was derived. Negative controls using the ALDH1 inhibitor DEAB are used to establish the gate separating ALDH<sup>Low</sup> from ALDH<sup>High</sup> fractions. (PDF)

**Figure S7** The anti-clonogenic effects of TGF $\beta$  are phenocopied by ectopic ALK5IKD. **A.** The anticlonogenic effects of TGF $\beta$  on IMECs are partially rescued by the phospho-ablative DNp63 $\alpha$ -AA mutant. Colony forming assay shown is representative of multiple experiments and corresponds to the graphical data displayed in Figure 7A. **B.** Ectopic expression of ALK5<sup>IKD</sup> is anti-clonogenic in IMEC cells. IMECs were transfected with pcDNA3.1-GFP and pcDNA3.1-ALK5<sup>IKD</sup> and selected in 200  $\mu$ g/ml G418 for 12 days. Colonies were fixed in alcohol and stained with crystal violet. Graph at right represents a quantification of the colony formation in which colonies from three random 1 cm  $\times$  1 cm squares were analyzed using ImageJ software. Bars represent the average of three counts and error bars represent the standard error of the mean. (PDF)

## Acknowledgments

The authors wish to thank Dr. Lalage Wakefield for valuable advice and expertise in TGF $\beta$  signaling.

## Author Contributions

Conceived and designed the experiments: JDR PC. Performed the experiments: PC SLD JYL AJD. Analyzed the data: ALB JAH. Wrote the paper: JDR PC.

## References

- Yang A, Kaghad M, Wang Y, Gillett E, Fleming MD, et al. (1998) p63, a p53 homolog at 3q27–29, encodes multiple products with transactivating, death-inducing, and dominant-negative activities. *Mol Cell* 2: 305–316.
- Mills AA, Zheng B, Wang XJ, Vogel H, Roop DR, et al. (1999) p63 is a p53 homologue required for limb and epidermal morphogenesis. *Nature* 398: 708–713.
- Yang A, Schweitzer R, Sun D, Kaghad M, Walker N, et al. (1999) p63 is essential for regenerative proliferation in limb, craniofacial and epithelial development. *Nature* 398: 714–718.
- Senoo M, Pinto F, Crum CP, McKeon F (2007) p63 Is Essential for the Proliferative Potential of Stem Cells in Stratified Epithelia. *Cell* 129: 523–536.
- Suh EK, Yang A, Kettenbach A, Bamberger C, Michaelis AH, et al. (2006) p63 protects the female germ line during meiotic arrest. *Nature* 444: 624–628.
- Yang A, Zhu Z, Kapranov P, McKeon F, Church GM, et al. (2006) Relationships between p63 binding, DNA sequence, transcription activity, and biological function in human cells. *Mol Cell* 24: 593–602.
- Rossi M, Aqeilan RI, Neale M, Candi E, Salomoni P, et al. (2006) The E3 ubiquitin ligase Itch controls the protein stability of p63. *Proc Natl Acad Sci U S A* 103: 12753–12758.
- Stehmeier P, Muller S (2009) Regulation of p53 family members by the ubiquitin-like SUMO system. *DNA Repair (Amst)* 8: 491–498.
- Jeon YJ, Jo MG, Yoo HM, Hong SH, Park JM, et al. (2012) Chemosensitivity is controlled by p63 modification with ubiquitin-like protein ISG15. *J Clin Invest* 122: 2622–2636.
- Su X, Cho MS, Gi YJ, Ayanga BA, Sherr CJ, et al. (2009) Rescue of key features of the p63-null epithelial phenotype by inactivation of Ink4a and Arf. *Embo J*.
- Jung MS, Yun J, Chae HD, Kim JM, Kim SC, et al. (2001) p53 and its homologues, p63 and p73, induce a replicative senescence through inactivation of NF-Y transcription factor. *Oncogene* 20: 5818–5825.
- Keyes WM, Wu Y, Vogel H, Guo X, Lowe SW, et al. (2005) p63 deficiency activates a program of cellular senescence and leads to accelerated aging. *Genes Dev* 19: 1986–1999.
- Keyes WM, Pecoraro M, Aranda V, Vernersson-Lindahl E, Li W, et al. (2011) DeltaNp63alpha is an oncogene that targets chromatin remodeler Lsh to drive skin stem cell proliferation and tumorigenesis. *Cell Stem Cell* 8: 164–176.
- Cerami E, Gao J, Dogrusoz U, Gross BE, Sumer SO, et al. (2012) The cBio Cancer Genomics Portal: An Open Platform for Exploring Multidimensional Cancer Genomics Data. *Cancer Discov* 2: 401–404.
- Leong CO, Vidnovic N, DeYoung MP, Sgroi D, Ellisen LW (2007) The p63/p73 network mediates chemosensitivity to cisplatin in a biologically defined subset of primary breast cancers. *J Clin Invest* 117: 1370–1380.
- Rocco JW, Leong CO, Kuperwasser N, DeYoung MP, Ellisen LW (2006) p63 mediates survival in squamous cell carcinoma by suppression of p73-dependent apoptosis. *Cancer Cell* 9: 45–56.
- Kent S, Hutchinson J, Balboni A, Decastro A, Cherukuri P, et al. (2011) DeltaNp63alpha promotes cellular quiescence via induction and activation of Notch3. *Cell Cycle* 10: 3111–3118.
- Ikushima H, Miyazono K (2010) TGF $\beta$  signalling: a complex web in cancer progression. *Nat Rev Cancer* 10: 415–424.
- Schmierer B, Hill CS (2007) TGF $\beta$ -SMAD signal transduction: molecular specificity and functional flexibility. *Nat Rev Mol Cell Biol* 8: 970–982.
- Attisano L, Carcamo J, Ventura F, Weis FM, Massague J, et al. (1993) Identification of human activin and TGF  $\beta$  type I receptors that form heteromeric kinase complexes with type II receptors. *Cell* 75: 671–680.

21. Wrana JL, Attisano L, Carcamo J, Zentella A, Doody J, et al. (1992) TGF beta signals through a heteromeric protein kinase receptor complex. *Cell* 71: 1003–1014.
22. Guo X, Wang XF (2009) Signaling cross-talk between TGF-beta/BMP and other pathways. *Cell Res* 19: 71–88.
23. Wakefield LM, Piek E, Bottlinger EP (2001) TGF-beta signaling in mammary gland development and tumorigenesis. *J Mammary Gland Biol Neoplasia* 6: 67–82.
24. Mullen AC, Orlando DA, Newman JJ, Loven J, Kumar RM, et al. (2011) Master transcription factors determine cell-type-specific responses to TGF-beta signaling. *Cell* 147: 565–576.
25. Parvani JG, Taylor MA, Schiemann WP (2011) Noncanonical TGF-beta signaling during mammary tumorigenesis. *J Mammary Gland Biol Neoplasia* 16: 127–146.
26. Di Costanzo A, Festa L, Duverger O, Vivo M, Guerrini L, et al. (2009) Homeodomain protein Dlx3 induces phosphorylation-dependent p63 degradation. *Cell Cycle* 8: 1185–1195.
27. Komatsu S, Takenobu H, Ozaki T, Ando K, Koida N, et al. (2009) Plk1 regulates liver tumor cell death by phosphorylation of TAp63. *Oncogene* 28: 3631–3641.
28. Suzuki D, Senoo M (2012) Increased p63 Phosphorylation Marks Early Transition of Epidermal Stem Cells to Progenitors. *J Invest Dermatol*.
29. Westfall MD, Joyner AS, Barbieri CE, Livingstone M, Pietenpol JA (2005) Ultraviolet radiation induces phosphorylation and ubiquitin-mediated degradation of DeltaNp63alpha. *Cell Cycle* 4: 710–716.
30. Yuan M, Luong P, Hudson C, Gudmundsdottir K, Basu S (2010) c-Abl phosphorylation of DeltaNp63alpha is critical for cell viability. *Cell Death Dis* 1: e16.
31. Lazzari C, Prodosmo A, Siepi F, Rinaldo C, Galli F, et al. (2011) HIPK2 phosphorylates DeltaNp63alpha and promotes its degradation in response to DNA damage. *Oncogene* 30: 4802–4813.
32. DiRenzo J, Signoretti S, Nakamura N, Rivera-Gonzalez R, Sellers W, et al. (2002) Growth factor requirements and basal phenotype of an immortalized mammary epithelial cell line. *Cancer Res* 62: 89–98.
33. Harnes DC, Bresnick E, Lubin EA, Watson JK, Heim KE, et al. (2003) Positive and negative regulation of deltaN-p63 promoter activity by p53 and deltaN-p63-alpha contributes to differential regulation of p53 target genes. *Oncogene* 22: 7607–7616.
34. Feng XH, Derynck R (1996) Ligand-independent activation of transforming growth factor (TGF) beta signaling pathways by heteromeric cytoplasmic domains of TGF-beta receptors. *J Biol Chem* 271: 13123–13129.
35. Wieser R, Wrana JL, Massague J (1995) GS domain mutations that constitutively activate T beta R-I, the downstream signaling component in the TGF-beta receptor complex. *Embo J* 14: 2199–2208.
36. Tojo M, Hamashima Y, Hanyu A, Kajimoto T, Saitoh M, et al. (2005) The ALK-5 inhibitor A-83-01 inhibits Smad signaling and epithelial-to-mesenchymal transition by transforming growth factor-beta. *Cancer Sci* 96: 791–800.
37. Ozdamar B, Bose R, Barrios-Rodiles M, Wang HR, Zhang Y, et al. (2005) Regulation of the polarity protein Par6 by TGFbeta receptors controls epithelial cell plasticity. *Science* 307: 1603–1609.
38. Gambichler T, Tomi NS, Skrygan M, Altmeyer P, Kreuter A (2006) Alterations of TGF-beta/Smad mRNA expression in atopic dermatitis following narrow-band ultraviolet B phototherapy: results of a pilot study. *J Dermatol Sci* 44: 56–58.
39. Lee HS, Kooshesh F, Sauder DN, Kondo S (1997) Modulation of TGF-beta 1 production from human keratinocytes by UVB. *Exp Dermatol* 6: 105–110.
40. Yin L, Morita A, Tsuji T (2003) The crucial role of TGF-beta in the age-related alterations induced by ultraviolet A irradiation. *J Invest Dermatol* 120: 703–705.
41. Biswas S, Guix M, Rinehart C, Dugger TC, Chytil A, et al. (2007) Inhibition of TGF-beta with neutralizing antibodies prevents radiation-induced acceleration of metastatic cancer progression. *J Clin Invest* 117: 1305–1313.
42. Nguyen DH, Oketch-Rabah HA, Illa-Bochaca I, Geyer FC, Reis-Filho JS, et al. (2011) Radiation acts on the microenvironment to affect breast carcinogenesis by distinct mechanisms that decrease cancer latency and affect tumor type. *Cancer Cell* 19: 640–651.
43. Javelaud D, Alexaki VI, Dennler S, Mohammad KS, Guise TA, et al. (2011) TGF-beta/SMAD/GLI2 signaling axis in cancer progression and metastasis. *Cancer Res* 71: 5606–5610.
44. Munger JS, Sheppard D (2011) Cross talk among TGF-beta signaling pathways, integrins, and the extracellular matrix. *Cold Spring Harb Perspect Biol* 3: a005017.
45. Reiner JE, Datta PK (2011) TGF-beta-dependent and -independent roles of STRAP in cancer. *Front Biosci* 16: 105–115.
46. Zwaagstra JC, Guimond A, O'Connor-McCourt MD (2000) Predominant intracellular localization of the type I transforming growth factor-beta receptor and increased nuclear accumulation after growth arrest. *Exp Cell Res* 258: 121–134.
47. Li N, Singh S, Cherukuri P, Li H, Yuan Z, et al. (2008) Reciprocal intraepithelial interactions between TP63 and hedgehog signaling regulate quiescence and activation of progenitor elaboration by mammary stem cells. *Stem Cells* 26: 1253–1264.
48. Ginestier C, Hur MH, Charafe-Jauffret E, Monville F, Dutcher J, et al. (2007) ALDH1 Is a Marker of Normal and Malignant Human Mammary Stem Cells and a Predictor of Poor Clinical Outcome. *Cell Stem Cell* 1: 555–567.
49. Cipriano R, Kan CE, Graham J, Danielpour D, Stampfer M, et al. (2011) TGF-beta signaling engages an ATM-CHK2-p53-independent RAS-induced senescence and prevents malignant transformation in human mammary epithelial cells. *Proc Natl Acad Sci U S A* 108: 8668–8673.
50. Lindsay J, McDade SS, Pickard A, McCloskey KD, McCance DJ (2011) Role of DeltaNp63gamma in epithelial to mesenchymal transition. *J Biol Chem* 286: 3915–3924.
51. Higashikawa K, Yoneda S, Tobiume K, Taki M, Shigeishi H, et al. (2007) Snail-induced down-regulation of DeltaNp63alpha acquires invasive phenotype of human squamous cell carcinoma. *Cancer Res* 67: 9207–9213.
52. Anderton MJ, Mellor HR, Bell A, Sadler C, Pass M, et al. (2011) Induction of heart valve lesions by small-molecule ALK5 inhibitors. *Toxicol Pathol* 39: 916–924.
53. Mu Y, Sundar R, Thakur N, Ekman M, Gudey SK, et al. (2011) TRAF6 ubiquitinates TGFbeta type I receptor to promote its cleavage and nuclear translocation in cancer. *Nat Commun* 2: 330.
