# Supplementary material for: Phosphorylation of ΔNp63α via a Novel TGFβ/ALK5 Signaling Mechanism Mediates the Anti-Clonogenic Effects of TGFβ
Source: PubMed Central journal article supplement (PMC3500343; doi:10.1371/journal.pone.0050066), 2012-11-16
Supplement: pone.0050066.s001.pdf [file pone.0050066.s001.pdf]

## Primary Screen

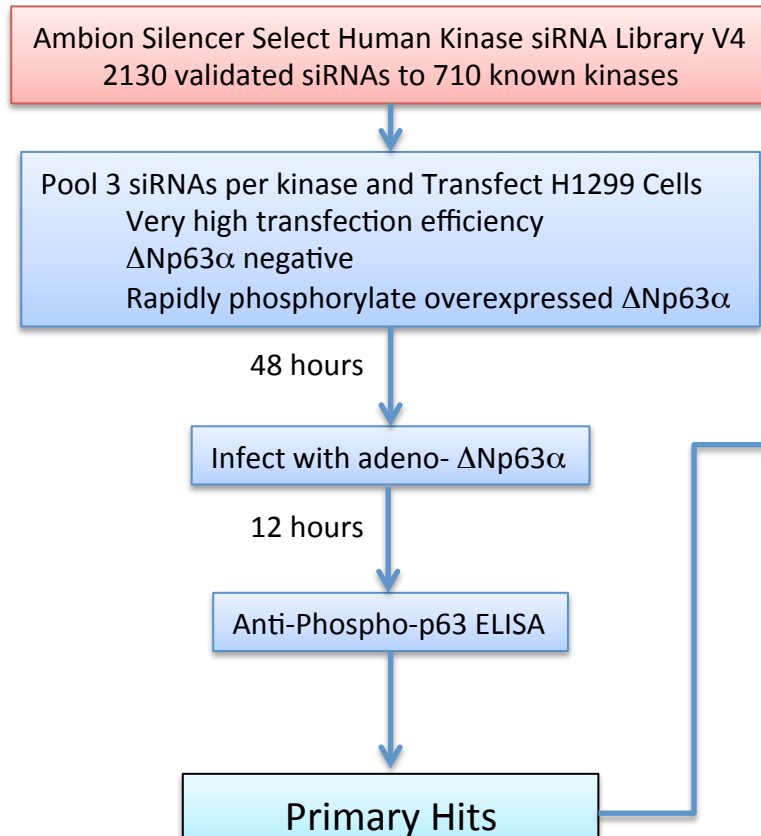

| Gene Symbol | Raw Kinase Data | C.V. Data |
|-------------|-----------------|-----------|
| PCTK3       | 2.598           | 0.127     |
| PIK3CD      | 2.698           | 0.149     |
| FRK         | 2.983           | 0.127     |
| GALK1       | 2.984           | 0.125     |
| TGFBR1      | 3.039           | 0.143     |
| CKB         | 3.053           | 0.129     |
| PHKG1       | 3.115           | 0.134     |
| SH3BP5L     | 3.115           | 0.136     |
| NTRK2       | 3.133           | 0.13      |
| PRKAA2      | 3.149           | 0.132     |
| PLK3        | 3.197           | 0.121     |
| GRK6        | 3.213           | 0.157     |
| PRPS1L1     | 3.218           | 0.14      |
| BTK         | 3.236           | 0.13      |

## Secondary Screen

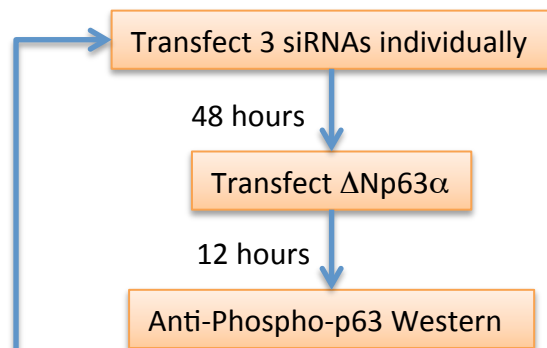

**Figure S1:** Schematic representation of the siRNA-based screen of the human kinome. The table at the bottom lists the top 14 hits in the screen showing the data produced from fluorescence plate readings of the IF and subsequent Abs<sub>600</sub> readings for crystal violet staining. Primary hits progressed to the secondary screen and kinases for which all three siRNAs repressed phosphorylation of ΔNp63α were selected.
