# Supplementary material for: Phosphorylation of ΔNp63α via a Novel TGFβ/ALK5 Signaling Mechanism Mediates the Anti-Clonogenic Effects of TGFβ
Source: PubMed Central journal article supplement (PMC3500343; doi:10.1371/journal.pone.0050066), 2012-11-16
Supplement: pone.0050066.s002.pdf [file pone.0050066.s002.pdf]

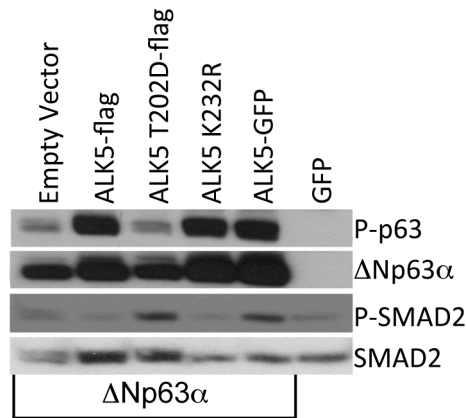

**Figure S2:** The molecular determinants of  $\Delta$ Np63 $\alpha$  phosphorylation by ALK5 are distinct from those necessary for SMAD2/3 phosphorylation. H1299 cells were co-transfected with wild-type ALK5, the T202D mutant which had previously been shown to constitutively activate TGF $\beta$  signaling, the K232R mutant which had been previously shown to inhibit TGF $\beta$  signaling and an ALK5-GFP fusion. At 24 hours post transfection protein was harvested and analyzed by western blot. Comparison of the P-p63 and P-SMAD2/3 signals indicated that T202D was unable to phosphorylate  $\Delta$ Np63 $\alpha$  but was able to phosphorylate SMAD2/3 (Lane 3). Remarkably the K232R mutant was able to phosphorylate  $\Delta$ Np63 $\alpha$  but not SMAD2/3 (Lane 4). These results suggest that the molecular mechanisms by which ALK5 phosphorylates  $\Delta$ Np63 $\alpha$  are distinct from those that phosphorylate SMAD2/3.
