# Supplementary material for: Phosphorylation of ΔNp63α via a Novel TGFβ/ALK5 Signaling Mechanism Mediates the Anti-Clonogenic Effects of TGFβ
Source: PubMed Central journal article supplement (PMC3500343; doi:10.1371/journal.pone.0050066), 2012-11-16
Supplement: pone.0050066.s003.pdf [file pone.0050066.s003.pdf]

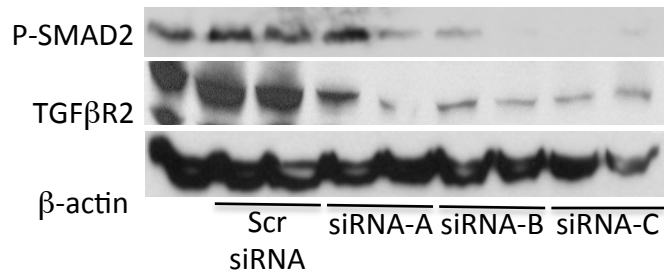

**Figure S3:** Effects of three TGFβ2-directed siRNAs on expression of TGFβ2 and SMAD2 phosphorylation. H1299 cells were transfected with the indicated siRNAs and TGFβ2 and phospho-SMAD2 were analyzed to confirm the efficacy of the siRNA. SiRNA-C was used in the experiment shown in Figure 2C.
