# Supplementary material for: Phosphorylation of ΔNp63α via a Novel TGFβ/ALK5 Signaling Mechanism Mediates the Anti-Clonogenic Effects of TGFβ
Source: PubMed Central journal article supplement (PMC3500343; doi:10.1371/journal.pone.0050066), 2012-11-16
Supplement: pone.0050066.s004.pdf [file pone.0050066.s004.pdf]

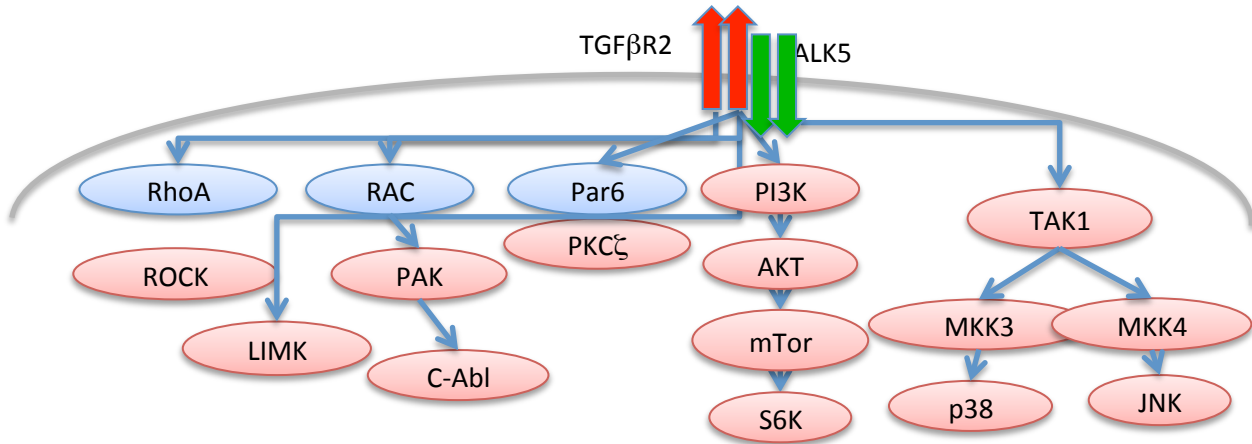

| Kinase | Score | StDev from Mean |
|--------|-------|-----------------|
| ALK5   | 3.039 | -2.252          |
| AKT1   | 3.419 | -1.734          |
| AKT2   | 3.488 | -1.640          |
| Abl    | 3.753 | -1.278          |
| MKK3   | 5.52  | -1.132          |
| p70S6K | 4.088 | -0.821          |
| TAK1   | 4.225 | -0.634          |
| PKCz   | 4.579 | -0.151          |
| LIMK   | 4.739 | 0.067           |
| PI3K   | 4.755 | 0.089           |
| AKT3   | 4.983 | 0.400           |
| MKK4   | 5.095 | 0.553           |
| ROCK   | 5.43  | 1.010           |
| PAK    | 5.799 | 1.513           |
| mToR   | 6.152 | 1.995           |

**Figure S4:** Schematic representation of signal transduction pathways known to be downstream of the TGFβ receptor complex. Kinases associated with these pathways are shown in pink and the phospho-p63 vs total p63 IF score is shown as is the relationship of that score to the mean.
