# Supplementary material for: Phosphorylation of ΔNp63α via a Novel TGFβ/ALK5 Signaling Mechanism Mediates the Anti-Clonogenic Effects of TGFβ
Source: PubMed Central journal article supplement (PMC3500343; doi:10.1371/journal.pone.0050066), 2012-11-16
Supplement: pone.0050066.s005.pdf [file pone.0050066.s005.pdf]

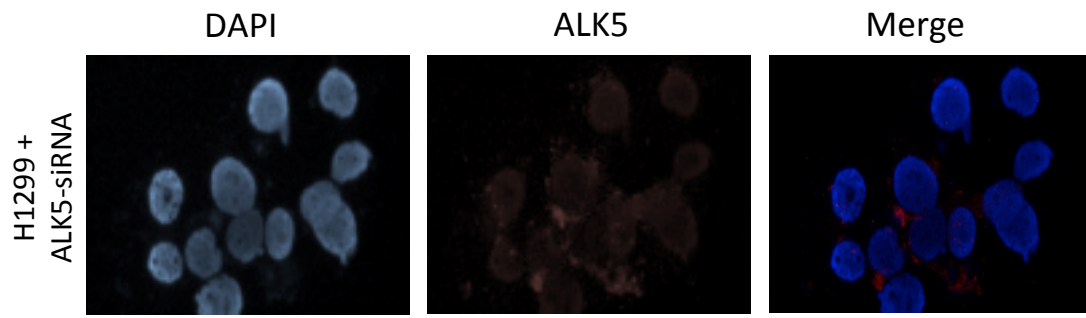

**Figure S5:** Transfection of H1299 cells with ALK5-directed siRNA ablates immunofluorescent detection of ALK5. This data confirms the specificity of ALK5 detection presented in Figure 4E. This data confirms the selectivity of the ALK5 antibody.
