# Supplementary material for: Phosphorylation of ΔNp63α via a Novel TGFβ/ALK5 Signaling Mechanism Mediates the Anti-Clonogenic Effects of TGFβ
Source: PubMed Central journal article supplement (PMC3500343; doi:10.1371/journal.pone.0050066), 2012-11-16
Supplement: pone.0050066.s006.pdf [file pone.0050066.s006.pdf]

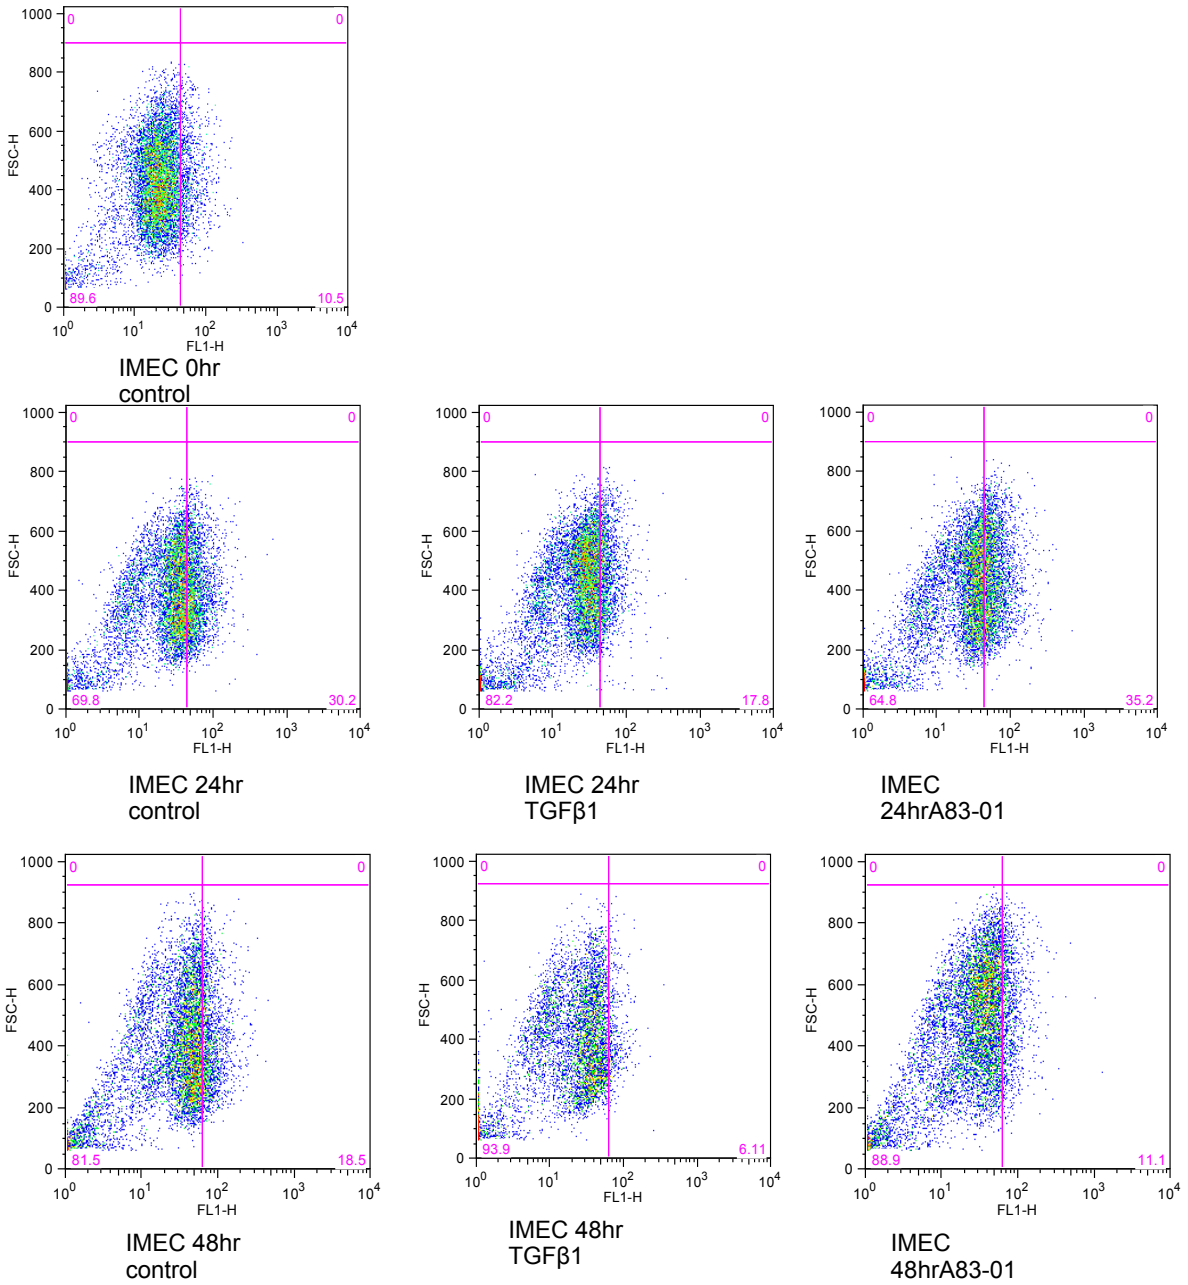

**Figure S6:** Representative Aldefluor data from which Figure 5D was derived. Negative controls using the ALDH1 inhibitor DEAB are used to establish the gate separating ALDH<sup>Low</sup> from ALDH<sup>High</sup> fractions.
