# Supplementary material for: Phosphorylation of ΔNp63α via a Novel TGFβ/ALK5 Signaling Mechanism Mediates the Anti-Clonogenic Effects of TGFβ
Source: PubMed Central journal article supplement (PMC3500343; doi:10.1371/journal.pone.0050066), 2012-11-16
Supplement: pone.0050066.s007.pdf [file pone.0050066.s007.pdf]

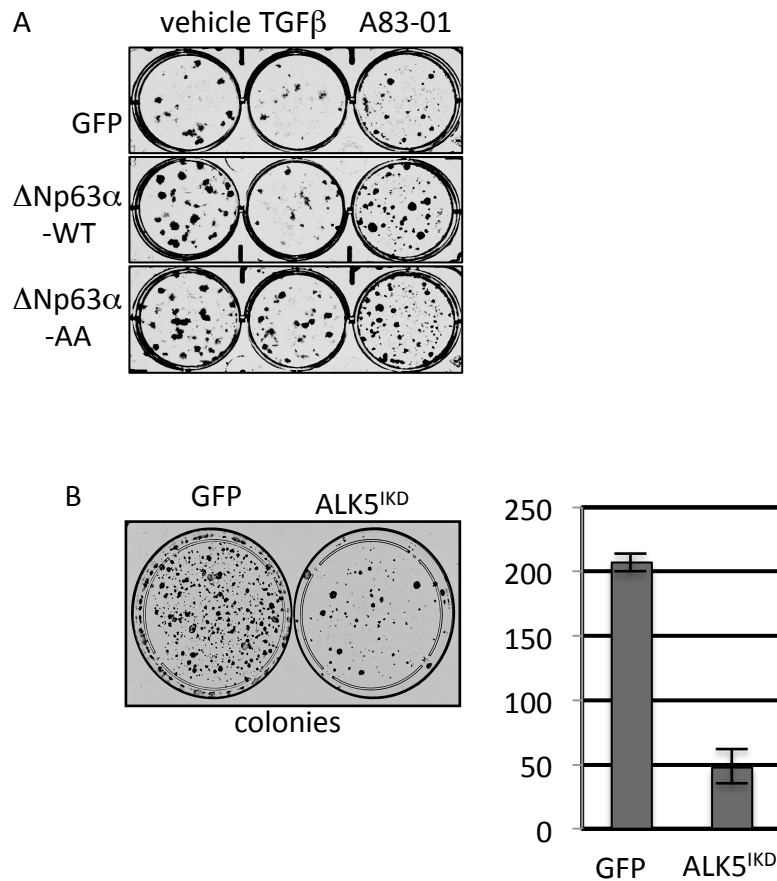

**Figure S7:** The anti-clonogenic effects of TGF $\beta$  are phenocopied by ectopic ALK5<sup>IKD</sup>. **A.** The anticlonogenic effects of TGF $\beta$  on IMECs are partially rescued by the phospho-ablative DNp63a-AA mutant. Colony forming assay shown is representative of multiple experiments and corresponds to the graphical data displayed in Figure 7A. **B.** Ectopic expression of ALK5<sup>IKD</sup> is anti-clonogenic in IMEC cells. IMECs were transfected with pcDNA3.1-GFP and pcDNA3.1-ALK5<sup>IKD</sup> and selected in 200  $\mu$ g/ml G418 for 12 days. Colonies were fixed in alcohol and stained with crystal violet. Graph at right represents a quantification of the colony formation in which colonies from three random 1 cm x 1cm squares were analyzed using ImageJ software. Bars represent the average of three counts and error bars represent the standard error of the mean.
